1 **Mucosal immunoglobulins protect the olfactory organ of teleost fish**  
2 **against parasitic infection**

3  
4 Yong-Yao Yu<sup>1¶</sup>, Wei-Guang Kong<sup>1¶</sup>, Ya-Xing Yin<sup>1</sup>, Fen Dong<sup>1</sup>, Zhen-Yu Huang<sup>1</sup>, Guang-Mei Yin<sup>1</sup>,  
5 Shuai Dong<sup>1</sup>, Irene Salinas<sup>2</sup>, Yong-An Zhang<sup>1</sup>, Zhen Xu<sup>1,3\*</sup>

6  
7 **1** Department of Aquatic Animal Medicine, College of Fisheries, Huazhong Agricultural University,  
8 Wuhan, Hubei, 430070, China, **2** Center for Evolutionary and Theoretical Immunology, Department  
9 of Biology, University of New Mexico, Albuquerque, New Mexico 87131, USA, **3** Laboratory for  
10 Marine Biology and Biotechnology, Qingdao National Laboratory for Marine Science and  
11 Technology, Qingdao 266071, China.

12  
13  
14 ¶These authors contributed equally to this work.

15  
16  
17  
18  
19  
20  
21  
22  
23  
24 \*Corresponding author:  
25 *E-mail:* [zhenxu@mail.hzau.edu.cn](mailto:zhenxu@mail.hzau.edu.cn)

26 **Abstract**

27 The olfactory organ of vertebrates receives chemical cues present in the air or water and, at the same  
28 time, they are exposed to invading pathogens. Nasal-associated lymphoid tissue (NALT), which  
29 serves as a mucosal inductive site for humoral immune responses against antigen stimulation, is  
30 present in teleosts and mammals. IgT in teleosts is responsible for similar functions to those carried  
31 by IgA in mammals. Moreover, teleost NALT is known to contain B-cells and teleost nasal mucus  
32 contains immunoglobulins (Igs). Yet, whether nasal B cells and Igs respond to infection remains  
33 unknown. We hypothesized that water-borne parasites can invade the nasal cavity of fish and elicit  
34 local specific immune responses. To address this hypothesis, we developed a model of bath infection  
35 with the *Ichthyophthirius multifiliis* (Ich) parasite in rainbow trout, *Oncorhynchus mykiss*, an ancient  
36 bony fish, and investigated the nasal adaptive immune response against this parasite. Critically, we  
37 found that Ich parasites in water could be reach the nasal cavity and successfully invade the nasal  
38 mucosa. Moreover, strong parasite-specific IgT responses were exclusively detected in the nasal  
39 mucus, and the accumulation of IgT<sup>+</sup> B-cells was noted in the nasal epidermis after Ich infection.  
40 Strikingly, local IgT<sup>+</sup> B-cell proliferation and parasite-specific IgT generation were found in the trout  
41 olfactory organ, providing new evidence that nasal-specific immune responses were induced locally  
42 by a parasitic challenge. Overall, our findings suggest that nasal mucosal adaptive immune responses  
43 are similar to those reported in other fish mucosal sites and that an antibody system with a dedicated  
44 mucosal Ig performs evolutionary conserved functions across vertebrate mucosal surfaces.

45

## 46 **Author Summary**

47 The olfactory organ is a vitally important chemosensory organ in vertebrates but it is also  
48 continuously stimulated by pathogenic microorganisms in the external environment. In mammals and  
49 birds, nasopharynx-associated lymphoid tissue (NALT) is considered the first line of immune  
50 defense against inhaled antigens and in bony fish, protecting against water-borne infections.  
51 However, although B-cells and immunoglobulins (Igs) have been found in teleost NALT, the  
52 defensive mechanisms of parasite-specific immune responses after pathogen challenge in the  
53 olfactory organ of teleost fish remain poorly understood. Considering that the NALT of all  
54 vertebrates has been subjected to similar evolutionary forces, we hypothesize that mucosal Igs play a  
55 critical role in the defense of olfactory systems against parasites. To confirm this hypothesis, we  
56 show the local proliferation of IgT<sup>+</sup> B-cells and production of pathogen-specific IgT within the nasal  
57 mucosa upon parasite infection, indicating that parasite-specific IgT is the main Ig isotype  
58 specialized for nasal-adaptive immune responses. From an evolutionary perspective, our findings  
59 contribute to expanding our view of nasal immune systems and determining the fate of the host–  
60 pathogen interaction.

## 61 **Introduction**

62       Olfaction is a vital sense for all animals [1]. To receive an olfactory signal, terrestrial vertebrates  
63 inhale gases containing volatile chemical substances, while aquatic vertebrates like teleost fish  
64 actively draw water containing dissolved chemicals into the olfactory organs [2]. Simultaneously,  
65 during this process, the olfactory organs are constantly stimulated by toxins and pathogens in the air  
66 or water [3]. Therefore, there is an evident need to defend the large, delicate surface of olfactory  
67 organs from pathogenic invasion.

68       In mammals, nasopharynx-associated lymphoid tissue (NALT), is a paired mucosal lymphoid  
69 organ containing well-organized lymphoid structures (organized MALT, O-MALT) and scattered or  
70 disseminated lymphoid cells (diffuse MALT, D-MALT) and is traditionally considered the first line  
71 of defense against external threats [4]. Similar to the Peyer's patches in the guts of mammals,  
72 O-NALT has distinct B-cell zones [5, 6], and humoral immune responses occur in response to  
73 infection or antigenic stimulation [7]. Importantly, the higher percentage of IgA<sup>+</sup> B-cells in D-NALT  
74 compared with that in O-NALT indicates that D-NALT may play an important role in nasal  
75 antibody-mediated immunity [8]. Interestingly, NALT in early vertebrates like teleost fish has  
76 structures and components similar to those of mammalian NALT [1]. Teleost NALT has thus far been  
77 described as D-NALT but lacks O-NALT. Teleost NALT includes B-cells, T cells, myeloid cells and  
78 expresses innate and adaptive related molecules [9]. Thus, from an evolutionary viewpoint, NALT in  
79 teleost fish is equipped to rapidly respond to antigens present in the water environment [3].

80       Teleost fish represent the most ancient bony vertebrates with a nasal-associated immune system  
81 [10] and containing immunoglobulins (Igs) [9]. So far, only three Ig classes (IgM, IgD, and IgT/Z)  
82 have been identified in teleosts [11]. Teleost IgM has been considered the principal Ig in plasma, and

83 strong parasite-specific IgM responses have been induced in systemic immunity [12-14]. Although  
84 secreted IgD (sIgD) has been found in the coating of a small percentage of the microbiota at the gill  
85 mucosa surface, its function remains unknown [15]. In contrast, teleost IgT (also called IgZ in some  
86 species) has been identified at the genome level and found to play a specialized role in response to  
87 pathogen infection in mucosal tissues [15-17]. Moreover, IgT<sup>+</sup> B-cells represent the predominant  
88 mucosal B-cell subset, and the accumulation of IgT<sup>+</sup> B-cells has been detected after infection in trout  
89 gut-, skin-, and gill-associated lymphoid tissues (GALT, SALT, and GIALT) [15-17]. Interestingly, in  
90 mammals, parasite-specific IgA has been mainly induced after pathogenic infection, and it has  
91 mediated nasal-adaptive immunity [18-20]. However, in teleosts, the role of the three Ig classes and  
92 B-cells in the olfactory organ is still unknown. Thus, given the abundance of IgT<sup>+</sup> B-cells as well as  
93 the high concentration of IgT in the olfactory organ [9, 21], we hypothesized that IgT is the major Ig  
94 involved in the pathogen-specific immune responses in the NALT of teleost fish.

95 To test the aforementioned hypothesis, here, we studied the nasal B-cell and parasite-specific Ig  
96 responses to the ciliated parasite *Ichthyophthirius multifiliis* (Ich) in rainbow trout, a model species  
97 in the field of evolutionary and comparative immunology [22, 23]. Our findings show that the  
98 olfactory system of rainbow trout is an ancient mucosal surface that elicits strong innate and adaptive  
99 immune responses to Ich infection. In addition, we demonstrate that IgT is the main Ig isotype  
100 playing a critical role in nasal adaptive immune responses. Furthermore, we show for the first time  
101 the local production of IgT at the nasal mucosa and proliferation of IgT<sup>+</sup> B-cells after a parasitic  
102 challenge in the olfactory organ of teleost fish. These results demonstrate that NALT is both an  
103 inductive and effector immune site in teleost fish.

104

## 105 **Results**

### 106 **Igs in olfactory organ of rainbow trout**

107 Here, nasal mucosa IgT was detected by Western blot consistent with the reported molecular mass  
108 using anti-trout IgT antibody [15-17]. To understand the protein characterization of nasal IgT, we  
109 collected the nasal mucosa of rainbow trout and loaded 0.5  $\mu$ l of processed mucus into a gel filtration  
110 column. From these results, we found that a portion of IgT in the nasal mucosa was present in  
111 polymeric form, as it eluted at a fraction similar to that of trout nasal IgM, a tetrameric Ig (Fig 1A),  
112 and simultaneously, some IgT was consistently eluted in monomeric form. Next, nasal mucosa  
113 polymeric IgT (pIgT) migrated to the same position as a monomer by SDS-PAGE under  
114 non-reducing conditions, indicating that nasal pIgT is associated by non-covalent interactions (Fig  
115 1B, right panel). However, unlike IgM and IgT, IgD in nasal mucosa eluted at 8.5 and 9.5 as a  
116 monomer at the molecular weight range previously studied for serum IgD [15]. Using Western blot,  
117 under the same immunoblot conditions, we found that nasal IgD and IgM migrated as a monomer  
118 and polymer, respectively (Fig 1B, left and middle panel). These findings are similar to those  
119 previously reported in the gut [16], skin [17], and gill [15]. Finally, using Western blot, we compared  
120 and analyzed the concentrations of three Igs and the ratios of IgT/IgM and IgD/IgM in nasal mucus  
121 and serum (Fig 1C–F), respectively. Our results showed that the protein concentration of IgT was ~  
122 164- and ~ 602-fold lower than that of IgM in nasal mucus and serum, respectively (Fig 1C and D).  
123 Although IgM was found to be the highest Ig in nasal mucosa, the IgT/IgM ratio in nasal mucus was  
124 ~ 4-fold higher than that in serum (Fig 1E), whereas there was no obvious difference between them  
125 in terms of the IgD/IgM ratio (Fig 1F).

## 126 **Polymeric Ig receptor (pIgR) in olfactory organ of rainbow trout**

127 In mammals, pIgR can mediate the transepithelial transport of secretory IgA (sIgA) into the nasal  
128 mucosa [27, 28]. In trout, we previously found that the secretory component of trout pIgR (tSC) is  
129 associated with secretory IgT (sIgT) in the gut [16], skin [17], and gills [15] and pIgR expression is  
130 very high in control rainbow trout olfactory organ [9]. Here, using pIgR polyclonal antibody [16],  
131 tSC was detected in the nasal mucosa but not in the serum (Fig 2A). By coimmunoprecipitation  
132 assay and immunoglobulins, we showed that antibodies against trout IgT was able to  
133 coimmunoprecipitate tSC in nasal mucus (Fig 2B). Moreover, using immunofluorescence  
134 microscopy, most of the pIgR-containing cells were located in the OE of trout, some of which were  
135 stained with IgT (Fig 2C; isotype-matched control antibodies (S1A Fig)).

## 136 **Response of immune-related genes in trout olfactory organ to Ich parasite infection**

137 To evaluate whether the trout olfactory organ expresses immune-related genes after pathogen  
138 challenge, we firstly selected the Ich parasite bath infection model and investigated nasal mucosal  
139 immune responses (S2A Fig). Ich is a parasite that directly invades the mucosal tissues of fish, such  
140 as the skin, gill, and fin, and it might elicit a strong immune response [15, 17], however, it has never  
141 been reported to infect the olfactory organ of fish. At 7 days post-infection, the phenotype of the  
142 small white dots appeared on the trout's skin and fin surface (S2B Fig), and by examining paraffin  
143 sections of olfactory organs stained with H & E, the Ich parasite was found within the nasal cavity  
144 and mucosa, interestingly, most of which were present in lateral regions compared with tips of nasal  
145 lamina propria (S2C Fig). In addition, by reverse transcription quantitative real-time PCR  
146 (RT-qPCR), we detected the expression of Ich-18SrRNA in the olfactory organ, gills, skin, head

147 kidney, and spleen of trout after 7 days infection and controls (S2D Fig). Ich-18SrDNA expression  
148 levels were comparable in the nose and the gills, one of the target organs of Ich, highlighting the  
149 importance of Ich nasal infections in trout. A time series study of Ich-18SrRNA expression showed  
150 that parasites levels in the nose peaked at day 7 post-infection with a second wave occurring at day  
151 21. Interestingly, Ich levels dropped dramatically on day 28 but increased again 75 days  
152 post-infection (S2E Fig). Using RT-qPCR, we measured the expression of 26 immune-related genes  
153 in the olfactory organ of trout at days 1, 7, 14, 21, 28, and 75 post-infection. Overall, greatest  
154 changes in expression of pro-inflammatory and complement-related genes as well as, occurred at 7  
155 days post-infection (Fig 3A, primers used are shown in S1 Table) when parasite levels were highest.  
156 Expression of IgT and IgM heavy chain genes, in turn, increased later during infection, starting at  
157 day 21 and peaking at day 28, whereas no obvious change in IgD heavy chain expression was  
158 observed (Fig 3A and B). IgT expression was the most up-regulated (~ 258-fold) compared to IgM (~  
159 116-fold) on day 28 and remained up-regulated on day 75 (~ 112-fold) compared to IgM which was  
160 only moderately higher than controls (~ 8-fold) (Fig 3B). Moreover, using histological examination,  
161 at 7 days post-infection, lamina propria (LP) of trout in the tip (~ 100  $\mu$ m) showed a significant  
162 enlargement (Fig 3C and D), increased goblet cells (Fig 3C and E) in nasal lamella compared with  
163 the control. By days 28 and 75, the tissue reaction was smaller, the LP showed some enlargement and  
164 abundant goblet cells appeared in nasal lamella (Fig 3C-E). Combined, these results demonstrate that  
165 apart from infecting gills, and skin, Ich is able to chronically infect the trout olfactory organ and  
166 induce strong long-lasting IgT responses.

## 167 **Response of Igs in trout olfactory organ to Ich parasite infection**



168 The high expression of IgT in the olfactory organ of trout after an Ich parasite challenge led us to  
169 hypothesize a critical role of IgT in nasal immunity. Using immunofluorescent micrographs, Ich  
170 trophonts could be easily detected in the olfactory organ of trout after 28 days of infection (Fig 4)  
171 using an anti-Ich antibody (isotype-matched control antibodies, S3 Fig). Interestingly, most parasites  
172 detected in the olfactory organ of trout were intensely coated with IgT, while only some parasites  
173 were slightly coated with IgM and nearly no parasites were coated with IgD (Fig 4). In addition, we  
174 found few IgT<sup>+</sup> and IgM<sup>+</sup> B-cells in the nasal epithelium of control fish (Fig 5A; isotype-matched  
175 control antibodies, S1B Fig left). Interestingly, a moderate increase of IgT<sup>+</sup> B-cells was observed in  
176 the nasal epithelium of trout after 28 days of infection (Fig 5B; isotype-matched control antibodies,  
177 S1B middle Fig). It is worth mentioning that a notable accumulation of IgT<sup>+</sup> B-cells was detected in  
178 the nasal epithelium of survivor fish (75 days post-infection) compared with control trout (Fig 5C;  
179 isotype-matched control antibodies, S1B right Fig). More importantly, we observed that some IgT<sup>+</sup>  
180 B-cells appeared to be secreting IgT (Fig 5C, white arrows). In contrast, the abundance of IgM<sup>+</sup>  
181 B-cells did not change in the infected and survivor fish when compared to the controls (Fig 5A–C).  
182 Next, we analyzed the percentages of IgT<sup>+</sup> and IgM<sup>+</sup> B-cells in the olfactory organs of control,  
183 infected, and survivor fish. We observed that, similar to the result obtained by immunofluorescence  
184 microscopy, the percentages of IgT<sup>+</sup> B-cells in the infected group ( $\sim 3.66 \pm 0.2\%$ ) and survivor group  
185 ( $\sim 4.43 \pm 0.28\%$ ) increased significantly compared to those of the control group ( $\sim 1.72 \pm 0.08\%$ )  
186 (Fig 6A). In contrast, the percentages of nasal IgM<sup>+</sup> B-cells did not change in the three groups (Fig  
187 6A). Unlike the results in the olfactory organ, the percentage of IgM<sup>+</sup> B-cells of the head kidney in  
188 the infected group ( $\sim 11.34 \pm 0.39\%$ ) showed a significant increase compared to that of the control  
189 group ( $\sim 6.53 \pm 0.27\%$ ), while the percentage of IgM<sup>+</sup> B-cells in the survivor group ( $\sim 8.65 \pm 0.67\%$ )

190 showed no significant change (Fig 6B). In contrast, the percentages of IgT<sup>+</sup> B-cells remained  
191 unchanged in both the infected groups and the survivor groups (Fig 5B). In agreement with the  
192 increased IgT<sup>+</sup> B-cells observed in the olfactory organ of infected and survivor fish, the IgT  
193 concentration in the nasal mucosa of these fish increased by ~ 2- and ~ 6-fold when compared with  
194 control fish, respectively. However, IgM and IgD protein concentrations did not change in any fish  
195 groups (Fig 6C). In serum, a ~ 5-fold increase of IgT concentration was observed only in the survivor  
196 group, whereas that of IgM in both the infected and survivor group increased by ~ 5-fold with  
197 respect to control fish (Fig 6D). As expected, the IgD protein concentration did not change  
198 significantly in infected or survivor fish (Fig 6D).

199 The results of large increases of IgT<sup>+</sup> B-cells and IgT protein levels in the olfactory organs of  
200 infected and survivor fish, together with the observation that parasites in the olfactory organ of  
201 infected fish appear intensely coated with IgT, suggested that parasite-specific IgT might be secreted  
202 in the nasal mucosa response to Ich infection. To verify this hypothesis, using a pull-down assay, we  
203 measured the capacity of nasal Igs to bind the Ich parasite (Fig 7). We found a significant increase in  
204 parasite-specific IgT binding in up to 1/10 (~ 3.2-fold) and 1/100 (~ 2.8-fold) of the diluted nasal  
205 mucus of infected (Fig 7B) and survivor fish (Fig 7C), respectively, when compared to that of control  
206 fish. However, in serum (Fig 7D–F), parasite-specific IgT binding was detected only in 1/10 dilution  
207 of survivor fish (Fig 7F). In contrast, parasite-specific IgM binding in up to 1/1000 and 1/4000 of the  
208 diluted serum of infected (Fig 7E) and survivor fish (Fig 7F) increased by ~ 2.9-fold and ~ 4.3-fold,  
209 respectively. Finally, in the nasal mucosa and serum of both the infected and survivor fish,  
210 Ich-specific IgD showed no change when compared to that of control fish (Fig 7A–F).

211 **Local proliferation of B-cells and Ig responses in trout olfactory organ after Ich parasite**

212 **infection**

213 To further evaluate whether an increase of IgT<sup>+</sup> B-cells in the olfactory organ of survivor fish was  
214 derived from the process of local IgT<sup>+</sup> B-cell proliferation or from influx of B cells from systemic  
215 lymphoid organs, we performed *in vivo* proliferation studies of IgT<sup>+</sup> B-cells and IgM<sup>+</sup> B-cells stained  
216 with EdU, which can incorporate into DNA during cell division [26]. Immunofluorescence  
217 microscopy analysis showed a significant increase in the percentage of proliferating cells in the  
218 olfactory organ of survivor fish ( $\sim 0.048 \pm 0.0006$  %) when compared with that of control animals ( $\sim$   
219  $0.019 \pm 0.0003$  %) (Fig 8A and B). Interestingly, we detected a significant increase in the  
220 proliferation of EdU<sup>+</sup> IgT<sup>+</sup> B-cells in survivor fish ( $\sim 5.21 \pm 0.23$  %) when compared with that of the  
221 control fish ( $\sim 0.58 \pm 0.05$  %) (Fig 8A and C). However, no difference was found in the percentage  
222 of EdU<sup>+</sup> IgM<sup>+</sup> B-cells of control fish and survivor fish (Fig 8A–C). Using flow cytometry, similar  
223 results were obtained (S4A Fig), with the percentage of EdU<sup>+</sup> IgT<sup>+</sup> B-cells increased significantly in  
224 the olfactory organ of survivor fish ( $\sim 5.67 \pm 0.10\%$  in all IgT<sup>+</sup> B-cells) when compared with that of  
225 control fish ( $\sim 3.46 \pm 0.26\%$  in all IgT<sup>+</sup> B-cells), while no difference in the percentage of EdU<sup>+</sup> IgM<sup>+</sup>  
226 B-cells was detected between control and survivor fish (S4A Fig). In the head kidney, the percentage  
227 of EdU<sup>+</sup> IgM<sup>+</sup> B-cells of the olfactory organ was detected in survivor fish, and it presented a large  
228 increase when compared with that of control fish. In contrast, these two groups showed no difference  
229 in proliferating IgT<sup>+</sup> B-cells (S4B Fig). The local proliferation of IgT<sup>+</sup> B-cells in the olfactory organ  
230 and the detection of parasite-specific IgT in nasal mucus (Fig 7) suggest that specific IgT in the trout  
231 olfactory organ is locally generated rather than produced and transported from systemic lymphoid  
232 organs.

233 To further address this hypothesis, we measured parasite-specific Igs titers from medium of

234 cultured olfactory organ, head kidney, and spleen explants from control and survivor fish (Fig 9). We  
235 detected parasite-specific IgT binding in 1/40 diluted medium (~ 3.6-fold) of cultured olfactory organ  
236 explants of survivor fish, whereas low parasite-specific IgM titers were detected only at the 1/10  
237 dilution in the same medium (Fig 9A and D). In contrast, dominant parasite-specific IgM binding (up  
238 to 1/40 dilutions) was observed in the medium of head kidney and spleen explants, and low  
239 parasite-specific IgT responses were detected in the same medium (Fig 9B–F). Interestingly,  
240 negligible parasite-specific IgD titers were detected in the medium of cultured olfactory organ, head  
241 kidney, and spleen explants from control and survivor fish (Fig 9A–F). Combined, these results  
242 demonstrate that specific Ig responses against parasites are compartmentalized in rainbow trout with  
243 IgT present in the olfactory organ and IgM present in systemic lymphoid tissues and serum.

## 244 **Discussion**

245 Protozoans are the most common parasites of freshwater and marine fish [29-31]. Ich is one of the  
246 most problematic parasites in freshwater ecosystems infecting many different fish species [32, 33].  
247 Ich has been traditionally associated with skin and gill lesions in rainbow trout [15, 17], however, the  
248 teleost olfactory organ is constantly exposed to the aquatic environment and therefore may represent  
249 a route of entry for any pathogen. Here we report for the first time that Ich can infect the olfactory  
250 organ of rainbow trout when the fish are exposed to the parasite by bath, the natural route of  
251 exposure. Importantly, we found that parasite loads in the olfactory organ were the highest along  
252 with the gills, suggesting that the olfactory route of infection may be one of the main targets of this  
253 parasite. Moreover, Ich transcript levels were detectable in the olfactory organ up to 75 days post  
254 exposure, indicating that Ich establishes long-term infections in this tissue. Given that the impacts of

255 Ich invasion via the nose have until now been overlooked, further investigations are required to  
256 determine the impacts of Ich nasal infections in the fish host health.

257 The olfactory organ of teleosts, similar to that of mammals, is coated by mucus containing Igs.  
258 In this study, we characterized in detail all three Ig classes in the nasal mucus of rainbow trout,  
259 including sIgD, secreted IgM (sIgM), and secreted IgT (sIgT). Trout nasal IgT existed for the most  
260 part as a polymer, similar to the characterized IgA in the nasal mucosa from humans [34, 35]. On the  
261 contrary, nasal IgD was in monomeric form, as previously reported in the gill [15] and serum [36].  
262 Interestingly, in agreement with the descriptions for gut [16], skin [17], and gill [15] sIgT, all  
263 subunits of polymeric nasal IgT in rainbow trout were associated by noncovalent interactions. In  
264 addition, we detected the concentrations of all three Igs in nasal mucosa and serum and found that  
265 although the concentration of IgT was lower than that of IgM in both nasal mucosa and serum, the  
266 ratio of IgT/IgM in nasal mucosa was higher than that in serum, in agreement with a previous report  
267 by Tacchi et al [9]. Combined, these findings underscore that mucus secretions in teleosts consist of  
268 mixtures of all three Ig isotypes and that Ig protein concentrations of each isotype differ among the  
269 four teleost MALT [15-17] as they do in mammals [37-39].

270 In mammals, NALT has been considered a mucosal inductive site for IgA [40-42]. Yet, it is not  
271 clear whether in fish, which lack organized lymphoid structures (adenoids and tonsils) in the teleost  
272 olfactory organ [9], NALT acts as an inductive and/or effector mucosal lymphoid tissue. In our Ich  
273 infection model, we found large increases in the concentration of IgT but not IgM or IgD at the  
274 protein level in the nasal mucosa of infected and surviving fish exposed to Ich, which correlated with  
275 the large accumulation of IgT<sup>+</sup> but not IgM<sup>+</sup> B-cells appearing in the olfactory epidermis of the same  
276 fish. In support, we showed a striking abundance of IgT coating on the Ich parasite surface in the

277 olfactory organ of rainbow trout. However, much lower or negligible levels of IgM or IgD coating  
278 were detected on the same parasites. These results suggested that a strong IgT but not IgM response  
279 to Ich takes place in the local olfactory environment. Interestingly, similar results were also  
280 discovered in our previous studies in the gut, skin, and gills [15-17]. In mammals, a dramatic  
281 increase of IgA secretion and significant accumulations of IgA-antibody forming cells (IgA-AFC)  
282 were induced in the nasal mucosa following intranasal infection with a small volume of influenza  
283 virus [18] and *N. fowleri* parasite [43-45], respectively. Based on our findings, it is clear that teleost  
284 NALT is a mucosal inductive site. Whether NALT-induced IgT<sup>+</sup> B-cell and plasma cell responses  
285 seed effector sites such as the gut lamina propria remains to be characterized in this or other models.  
286 Finally, our results strengthen the notion that despite anatomical differences and the absence of  
287 organized NALT structures in teleosts, IgT and IgA carry out play vital roles in nasal adaptive  
288 immune responses.

289 Immunoglobulins are of particular relevance in the context of Ich infections since previous  
290 studies have demonstrated that antibody (IgM) mediated responses against Ich i-antigen trigger the  
291 exit of the parasite from the fish host skin conferring host disease resistance [46, 47]. Similarly, in  
292 our model, Ich was being expelled at day 28 and minority stay in nasal cavity, but interestingly,  
293 expelled Ich was mainly coated by IgT. In addition, we recorded the greatest upregulation in the  
294 expression of the IgT heavy chain gene in the trout olfactory organ 28 days after Ich exposure, the  
295 same time point when Ich levels dropped dramatically, suggesting that IgT might play a crucial role  
296 in the nasal immune response to Ich infection and may contribute to parasite clearance or exit. At this  
297 point, IgM expression levels had also increased in the olfactory organ and some detectable titers of  
298 parasite-specific IgM were found in trout nasal mucosa. Nasal IgM titers might be the result of

299 Ich-instigated microlesions in the olfactory system and consequent leakage of parasite-specific IgM  
300 or plasma from the blood. Thus, specific IgT responses appear to be the most critical antibody  
301 response against Ich in the nasal environment and further studies should address how IgT contributes  
302 to parasite clearance from trout mucosal surfaces.

303 Interestingly, similar to the previous results in the gill, our results indicated that negligible  
304 parasite-specific IgD responses were induced in both the nasal mucosa and serum after Ich  
305 challenges. However, because of the detectable concentrations of IgD in both the nasal mucosa and  
306 serum, we cannot exclude the possibility that relevant IgD may be induced in the nasal mucosa or  
307 systemic compartment when using different pathogens or stimulation routes. Thus, future studies are  
308 needed to investigate the role of nasal and systemic IgD in the parasite-specific immune responses of  
309 teleost fish against different pathogens.

310 The accumulations of IgT<sup>+</sup> B-cells observed in the olfactory epidermis correlated with high  
311 parasite-specific IgT titers in the same fish led us to hypothesize the local proliferation and  
312 production of the parasite-specific IgT<sup>+</sup> B-cell response. IgT<sup>+</sup> B-cell proliferation responses were  
313 detected in the olfactory organ but not in the systemic immune organs (head kidney and spleen) of  
314 the same fish, which strongly suggests that the accumulation of IgT<sup>+</sup> B-cells in the olfactory organ is  
315 due to local proliferation rather than migration from other organs. We also show that olfactory tissue  
316 explants produce specific anti-Ich IgT antibodies, demonstrating the presence of specific plasma cells  
317 in the local nasal mucosa. Interestingly, these results parallel our previous finding in the trout gill,  
318 and the proliferation rates we detected here was similar to the ones we have described in gills [15]  
319 but higher than those in olfactory organ in response to IHNV [21], which might be due to the  
320 different duration after infection/immunization with different pathogen, respectively. It is worth

321 noting that similar results were found in the NALT of mammals. For instance, previous studies have  
322 shown that intranasal immunization with *Naegleria fowleri* could induce the secretion of IgA and  
323 IgG in nasal mucosa but pathogen-specific IgA mainly mediates local nasal immunity in mammals  
324 [48, 49]. By *in vitro* culture of NALT cells following virus infection, parts of the virus-specific  
325 antibody-forming cells (AFCs) were observed to originate from B-cell precursors in NALT [18].  
326 Moreover, in the nasal mucosa from 53 humans with chronic inflammation, most IgA seemed to be  
327 produced locally by IgA-producing plasma cells [50]. Hence, our results indicate that the local  
328 proliferation of mucosal B-cells and production of secretory Ig responses in the nasal mucosa  
329 happens not only in tetrapod species but also in early vertebrates such as teleost fish.

330 The fish olfactory mucosa is a complex neuroepithelium in which lymphoid and myeloid cells  
331 are found in a scattered manner [9] among basal cells, sustentacular cells, olfactory sensory neurons,  
332 goblet cells and epithelial cells (Figure 10). In agreement with histological changes, strong immune  
333 responses including the upregulation of cytokine expression and complement genes were detected in  
334 the olfactory organ, especially at the early stages of the infection, preceding the onset of Ig responses.  
335 Interestingly, in mammals [43], intranasal administration with *N. fowleri* lysates plus cholera toxin  
336 (CT) results in increased expression of genes for IL-10, IL-6, IFN- $\gamma$ , TNF- $\alpha$ , and IL-1 $\beta$ . This immune  
337 expression signatures largely resemble those found in the present study. Thus, despite the lack of  
338 organized lymphoid structures in the olfactory organs of teleosts [3, 9], teleost fish mount strong  
339 cytokine responses upon pathogen invasion or immunization with antigenic analogues.

340 In conclusion, our results provide the first evidence that parasite infection, antigen presentation,  
341 local B-cell activation and proliferation, as well as parasite-specific IgT production occur in the  
342 olfactory organ of teleost fish (Fig 10). Thus, although parasites such as Ich can infect the olfactory



343 organ of fish, local IgT<sup>+</sup> B-cells and parasite-specific IgT appear to be a major mechanism by which  
344 the host acquires resistance to this parasite. Our findings not only expand our view of nasal immune  
345 systems from an evolutionary perspective but also suggest that nasal vaccination may be an effective  
346 way to prevent aquatic parasitic diseases.

## 347 **Materials and methods**

### 348 **Ethics statement**

349 All experimental protocols involving fish were performed in accordance with the recommendations  
350 in the Guide for the care and use of Laboratory Animals of the Ministry of Science and Technology  
351 of China and were approved by the Scientific Committee of Huazhong Agricultural University  
352 (permit number HZAUF1-2016-007).

### 353 **Fish**

354 Rainbow trout (20-30 g) were obtained from fish farm in Shiyan (hubei, China), and maintained  
355 them in aquarium tanks using a water recirculation system involving thermostatic temperature  
356 control and extensive biofiltration. Fish were acclimatized for at least 2 wk at 15 °C and fed daily  
357 with commercial trout pellets at a rate of 0.5-1 % body weight day<sup>-1</sup>, and feeding was terminated 48 h  
358 prior to sacrifice.

### 359 **Ich parasite isolation and infection**

360 The method used for Ich parasite isolation and infection were described previously by Xu et al [17]  
361 with slight modification. Briefly, heavily infected rainbow trout were anaesthetized with overdose of  
362 MS-222 and placed in a beaker with water to allow trophonts and tomonts exit the fish. The  
363 trophonts and tomonts were left in the water at 15 °C for 24 h to let tomocyst formation and

364 subsequent theront release. For parasite infection, two types of challenges with Ich were performed.  
365 The first group, fish were exposed to a single dose of ~ 5,000 theronts per fish added into the  
366 aquarium, and tissue samples and fluids (serum and nasal mucus) were taken after 28 days (infected  
367 fish). The second group, fish were monthly exposed during 75 days period with ~ 5,000 theronts per  
368 fish (survival fish). Fish samples were taken two weeks after the last challenge. Experiments were  
369 performed at least three independent times. Control fish (mock infected) were maintained in a similar  
370 tank but without parasites. During the whole experiment periods, the fish were raised in a flow  
371 through aquaria at 15 °C and fed daily with commercial trout pellets at a rate of 0.5-1 % body weight  
372 day<sup>-1</sup>.

### 373 **Collection of serum, olfactory tissue and nasal mucus**

374 For sampling, trout were anaesthetized with MS-222 and serum was collected and stored as  
375 described [16]. To obtain fish nasal mucus, we modified the method described previously [9, 15].  
376 Briefly, trout olfactory tissue was excised rinsed with PBS three times to remove the remaining blood.  
377 Thereafter, olfactory tissue was incubated for 12 h at 4 °C, with slightly shaking in protease inhibitor  
378 buffer (1 × PBS, containing 1 × protease inhibitor cocktail (Roche), 1 mM phenylmethylsulfonyl  
379 fluoride (Sigma); pH 7.2) at a ratio of 100 mg of olfactory tissue per ml of buffer. The suspension  
380 (nasal mucus) was transferred to an Eppendorf tube, and then the supernatant was vigorously  
381 vortexed and centrifuged at 400 g for 10 min at 4 °C to remove trout cells. Furthermore, the olfactory  
382 organ was taken and fixed into 4 % neutral buffered formalin for hematoxylin and eosin (H & E)  
383 staining and immunostaining.

### 384 **Isolation of trout HK and NALT leukocytes**

385 The leucocytes from head kidney were obtained using a modified methodology as described  
386 previously [15, 24]. To obtain trout nasopharynx-associated lymphoid tissue (NALT) leukocytes, we

387 modified the existing protocol as explained by Tacchi et al [9]. Briefly, rainbow trout were  
388 anaesthetized with MS-222 and blood was collected from the caudal vein. The olfactory organ was  
389 taken and washed with cold PBS to avoid blood contamination. Leucocytes from trout olfactory  
390 organ were isolated by mechanical agitation of both olfactory rosettes in DMEM medium  
391 (supplemented with 5 % FBS, 100 U ml<sup>-1</sup> penicillin and 100 µg ml<sup>-1</sup> streptomycin) at 4 °C for 30  
392 min with continuous shaking. Leucocytes were collected, and the aforementioned procedure was  
393 repeated four times. Thereafter, the olfactory organ pieces were treated with PBS (containing 0.37  
394 mg ml<sup>-1</sup> EDTA and 0.14 mg ml<sup>-1</sup> dithiothreitol DTT) for 30 min followed by enzymatic digestion  
395 with collagenase (Invitrogen, 0.15 mg ml<sup>-1</sup> in PBS) for 1 h at 20 °C with continuous shaking. All  
396 cell fractions obtained from the olfactory organ after mechanical and enzymatic treatments were  
397 washed three times in fresh modified DMEM and layered over a 51/34 % discontinuous Percoll  
398 gradient. After 30 min of centrifugation at 400 g, leucocytes lying at the interface of the gradient  
399 were collected and washed with modified DMEM medium.

#### 400 **SDS-PAGE and western blot**

401 Nasal mucus and serum samples were resolved on 4-15 % SDS-PAGE Ready Gel (Bio-Rad) under  
402 non-reducing or reducing conditions as described previously [15-17]. For western blot analysis, the  
403 gels were transferred onto PVDF membranes (Bio-Rad). Thereafter, the membranes were blocked  
404 with 8 % skim milk and incubated with anti-trout IgT (rabbit pAb), anti-trout IgM (mouse  
405 monoclonal antibody (mAb)) or biotinylated anti-trout IgD (mouse mAb) antibodies followed by  
406 incubation with peroxidase-conjugated anti-rabbit, anti-mouse IgG (Invitrogen) or streptavidin  
407 (Invitrogen). Immunoreactivity was detected with an enhanced chemiluminescent reagent (Advansta)  
408 and scanned by GE Amersham Imager 600 Imaging System (GE Healthcare). The captured gel  
409 images were analysed by using ImageQuant TL software (GE Healthcare). Thereafter, the  
410 concentration of IgM, IgD and IgT were determined by plotting the obtained signal strength values

411 on a standard curve generated for each blot using known amounts of purified trout IgM, IgD or IgT.

## 412 **Gel filtration**

413 To analysis the monomeric or polymeric state of Igs in trout nasal mucus, gel filtration analyses were  
414 performed using as described previously for gut [16] and gill mucus [15]. In short, fractions  
415 containing the IgM, IgT or IgD were separated by gel filtration using a Superdex-200 FPLC column  
416 (GE Healthcare). The column was previously equilibrated with cold PBS (pH 7.2), and protein  
417 fractions were eluted at  $0.5 \text{ ml min}^{-1}$  with PBS using a fast protein LC instrument with purifier  
418 systems (GE Healthcare). Identification of IgM, IgD and IgT in the eluted fractions was performed  
419 by western blot analysis using anti-IgM, anti-IgD and anti-IgT antibodies, respectively. A standard  
420 curve was generated by plotting the elution volume of the standard proteins in a Gel Filtration  
421 Standard (Bio-Rad) against their known molecular weight, which was then used to determine the  
422 molecular weight of the eluted IgT, IgM and IgD by their elution volume.

## 423 **Flow cytometry**

424 For flow cytometry studies of B cells in the head kidney and NALT, leukocyte suspensions were  
425 double-stained with monoclonal mouse anti-trout IgT and anti-trout IgM ( $1 \mu\text{g ml}^{-1}$  each) at  $4 \text{ }^\circ\text{C}$  for  
426 45 min. After washing three times, PE-goat anti-mouse IgG1 and APC-goat anti-mouse IgG2b ( $1 \mu\text{g}$   
427  $\text{ml}^{-1}$  each, BD Biosciences) were added and incubated at  $4 \text{ }^\circ\text{C}$  for 45 min to detect  $\text{IgM}^+$  and  $\text{IgT}^+$  B  
428 cells, respectively. After washing three times, analysis of stained leucocytes was performed with a  
429 CytoFLEX flow cytometer (Beckman coulter) and analysed by FlowJo software (Tree Star).

## 430 **Histology, light microscopy and immunofluorescence microscopy studies**

431 The olfactory organ of rainbow trout was dissected and fixed in 4 % neutral buffered formalin  
432 overnight at  $4 \text{ }^\circ\text{C}$  and then transferred to 70 % ethanol. Samples were then embedded in paraffin and

433 5  $\mu\text{m}$  thick sections stained with haematoxylin / eosin (H & E). Images were acquired in a  
434 microscope (Olympus) using the Axiovision software. For the detection of Ich parasite at the same  
435 time of  $\text{IgT}^+$  and  $\text{IgM}^+$  B cells, sections were double-stained with rabbit anti-trout IgT (pAb;  $0.49 \mu\text{g}$   
436  $\text{ml}^{-1}$ ) and mouse anti-trout IgM (IgG1 isotype;  $1 \mu\text{g ml}^{-1}$ ) overnight at  $4 \text{ }^\circ\text{C}$ . After washing three times,  
437 secondary antibodies Alexa Fluor 488-conjugated AffiniPure Goat anti-rabbit IgG or Cy3-conjugated  
438 AffiniPure Goat anti-mouse IgG (Jackson ImmunoResearch Laboratories Inc.) at  $2.5 \mu\text{g ml}^{-1}$  each  
439 were added and incubated at temperature for 40 min to detect  $\text{IgT}^+$  and  $\text{IgM}^+$  B cells, respectively.  
440 After washing three times, mouse anti-Ich polyclonal antibody ( $1 \mu\text{g ml}^{-1}$ ) were added and incubated  
441 at  $4 \text{ }^\circ\text{C}$  for 6 h, after washing three times, secondary antibody Alexa Fluor 647-goat anti-mouse  
442 (Jackson ImmunoResearch Laboratories Inc.) with  $5 \mu\text{g ml}^{-1}$  were added and incubated at  
443 temperature for 40 min to detect Ich parasite. For detection of trout nose pIgR, we used the same  
444 methodology described to stain gill pIgR by using our rabbit anti-pIgR [16]. As controls, the rabbit  
445 IgG pre-bleed and the mouse-IgG1 isotype antibodies were labelled with the same antibody labelling  
446 kits and used at the same concentrations. Before mounting, all samples were stained with DAPI (4',  
447 6-diamidino-2-phenylindole;  $1 \mu\text{g ml}^{-1}$ : Invitrogen) for the sections. Images were acquired and  
448 analysed using Olympus BX53 fluorescence microscope (Olympus) and the iVision-Mac scientific  
449 imaging processing software (Olympus).

#### 450 **Proliferation of B cells in the olfactory organ of trout**

451 For proliferation of B cells studies, we modified the methodology as previously reported by us [15].  
452 Briefly, control and survivor fish ( $\sim 30\text{g}$ ) were anaesthetized with MS-222 and intravenous injected  
453 with  $200 \mu\text{g}$  EdU (Invitrogen). After 24 h, leucocytes from head kidney or olfactory tissue were  
454 obtained as described above, and cells were incubated with  $10 \mu\text{M}$  of EdU (Invitrogen) for 2 hours.  
455 Thereafter, leucocytes were incubated with mAb mouse anti-trout IgM and anti-trout IgT ( $1 \mu\text{g ml}^{-1}$   
456 each) at  $4 \text{ }^\circ\text{C}$  for 45 min. After washing three times, Alexa Fluor 488-goat anti-mouse IgG

457 (Invitrogen) was used as secondary antibody to detect IgM<sup>+</sup> or IgT<sup>+</sup> B cells. After incubation at 4 °C  
458 for 45 min, cells were washed three times with DMEM medium and fixed with 4 % neutral buffered  
459 formalin at room temperature for 15 min. EdU<sup>+</sup> cell detection was performed according to the  
460 manufacturer's instructions (Click-iT EdU Alexa Fluor 647 Flow Cytometry Assay Kit, Invitrogen).  
461 Cells were thereafter analysed in a CytoFLEX flow cytometer (Beckman coulter) and FlowJo  
462 software (Tree Star). For immunofluorescence analysis, as described above, we used the paraffin  
463 sections of olfactory organ from control and survival fish previously injected with EdU and  
464 incubated at 4 °C for 45 min with rabbit anti-trout IgT (pAb; 1 µg ml<sup>-1</sup>) and mouse anti-trout IgM  
465 (IgG1 isotype; 1 µg ml<sup>-1</sup>). After washing with PBS, paraffin sections were incubated for 2 h at room  
466 temperature with Alexa Fluor 488-conjugated AffiniPure Goat anti-rabbit IgG or Cy3-conjugated  
467 AffiniPure Goat anti-mouse IgG (Jackson ImmunoResearch Laboratories Inc.) at 2.5 µg ml<sup>-1</sup> each.  
468 Stained cells were fixed with 4 % neutral buffered formalin and EdU<sup>+</sup> cell detection was performed  
469 according to the manufacturer's instructions (Click-iT EdU Alexa Fluor 647 Imaging Kit, Invitrogen).  
470 Cell nuclei were stained with DAPI (1 µg ml<sup>-1</sup>) before mounting with fluorescent microscopy  
471 mounting solution. Images were acquired and analysed using an Olympus BX53 fluorescence  
472 microscope (Olympus) and the iVision-Mac scientific imaging processing software (Olympus).

### 473 **Tissue explants culture**

474 To assess whether the parasite-specific IgT responses were locally generated in the olfactory organ,  
475 we analysed parasite-specific immunoglobulin titers from medium derived of cultured olfactory  
476 organ, head kidney and spleen explants obtained from control and survivor fish as previously  
477 described by us [15]. In short, control and survivor fish were anaesthetized with an overdose of  
478 MS-222, and blood was removed through the caudal vein to minimize the blood content in the  
479 collected organs. Thereafter, olfactory organ, head kidney and spleen were collected. Approximately  
480 20 mg of each tissue was submerged in 70 % ethanol for 1 min to eliminate possible bacteria on their

481 surface and then washed twice with PBS. Thereafter, tissues were placed in a 24-well plate and  
482 cultured with 200 ml DMEM medium (Invitrogen), supplemented with 10 % FBS, 100 U ml<sup>-1</sup>  
483 penicillin, 100 µg ml<sup>-1</sup> streptomycin, 200 µg ml<sup>-1</sup> amphotericin B and 250 µg ml<sup>-1</sup> gentamycin  
484 sulfate, with 5 % CO<sub>2</sub> at 17 °C. After 7 days culture, supernatants were harvested, centrifuged and  
485 stored at 4 °C prior to use the same day.

#### 486 **Binding of trout immunoglobulins to Ich**

487 The capacity of IgT, IgM and IgD from serum, nasal mucus or tissue (olfactory organ, head kidney  
488 and spleen) explant supernatants to bind to Ich was measured by using a pull-down assay as  
489 described previously [15, 17]. Briefly, approximately 100 tomonts were pre-incubated with a  
490 solution of 0.5 % BSA in PBS (pH 7.2) at 4 °C for 2 h. Thereafter, tomonts were incubated with  
491 diluted nasal mucus or serum or tissue (olfactory organ, head kidney and spleen) explant  
492 supernatants from infected, survivor or control fish at 4 °C for 4 h with continuous shaking in a 300  
493 ml volume. After incubation, the tomonts were washed three times with PBS and bound proteins  
494 were eluted with 2 × Laemmli Sample Buffer (Bio-Rad) and boiled for 5 min at 95 °C. The eluted  
495 material was resolved on 4-15 % SDS-PAGE Ready Gel under non-reducing conditions, and the  
496 presence of IgT, IgM or IgD was detected by western blotting using anti-trout IgT, IgM or IgD  
497 antibodies as described above.

#### 498 **RNA isolation and quantitative real-time PCR (qPCR) analysis**

499 Total RNA was extracted by homogenization in 1 ml TRIZol (Invitrogen) using steel beads and  
500 shaking (60 HZ for 1 min) following the manufacturer's instructions. The quantification of the  
501 extracted RNA was carried out using a spectrophotometry (NanoPhotometer NP 80 Touch) and the  
502 integrity of the RNA was determined by agarose gel electrophoresis. To normalize gene expression  
503 levels for each sample, equivalent amounts of the total RNA (1000 ng) were used for cDNA

504 synthesis with the SuperScript first-strand synthesis system for qPCR (Abm) in a 20 µl reaction  
505 volume. The synthesized cDNA was diluted 4 times and then used as a template for qPCR analysis.  
506 The qPCRs were performed on a 7500 Real-time PCR system (Applied Biosystems) using the  
507 EvaGreen 2 × qPCR Master mix (Abm). All samples were performed following conditions: 95 °C for  
508 30 s, followed by 40 cycles at 95 °C for 1 s and at 58 °C for 10 s. A dissociation protocol was carried  
509 out after thermos cycling to confirm a band of the correct size was amplified. Ct values determined  
510 for each sample were normalized against the values for housekeeping gene (EF1α). To gain some  
511 insights on the kinetics of the immune responses that takes place after Ich infection, twenty-six  
512 immune relevant genes, such as cytokine, complement and Igs genes were detected in the olfactory  
513 organ. The relative expression level of the genes was determined using the Pfaffl method [25]. The  
514 primers used for qRT-PCR are listed in Sup1 Table.

#### 515 **Co-immunoprecipitation studies**

516 We followed the same strategy to detect the association of pIgR to IgT in gut, skin and gill mucus as  
517 we previously described [15-17]. To detect whether polymeric trout IgT present in the nasal mucus  
518 were associated to a secretory component-like molecule derived from trout secretory component-like  
519 molecule (tSC), we performed co-immunoprecipitating analysis using anti-trout IgT (pAb)  
520 antibodies with the goal to potentially co-immunoprecipitate the tSC. To this end, 10 µg of anti-IgT  
521 were incubated with 300 µl of trout nasal mucus. As control for these studies, the same amount of  
522 rabbit IgG (purified from the pre-bleed serum of the rabbit) were used as negative controls for  
523 anti-IgT. After overnight incubation at 4°C, Dynabeads Protein G (10001D; 50µl; Invitrogen)  
524 prepared previously was added into each reaction mixture and incubated for 1 h at 4 °C following the  
525 manufacturer's instructions. Thereafter, the beads were washed five times with PBS, and



526 subsequently bound proteins were eluted in 2 × Laemmli Sample Buffer (Bio-Rad). The eluted  
527 material was resolved by SDS-PAGE on 4–15% Tris-HCl Gradient ReadyGels (Bio-Rad) under  
528 reducing (for tSC detection) or non-reducing (for IgT detection) conditions. Western blot was  
529 performed with anti-pIgR and anti-IgT antibodies as described above.

### 530 **Statistical analysis**

531 An unpaired Student's *t*-test and one-way analysis of variance with Bonferroni correction (Prism  
532 version 6.01; GraphPad) were used for analysis of differences between groups. Data are expressed as  
533 mean ± s.e.m. *P* values less than 0.05 were considered statistically significant.

### 534 **Acknowledgments**

535 We thank Dr. J. Oriol Sunyer (University of Pennsylvania) for his generous gift of anti-trout IgM,  
536 anti-trout IgD, anti-trout IgT mAbs, anti-trout IgT and anti-trout pIgR pAbs.

### 537 **References**

- 538 1. Ache BW, Young JM. Olfaction: diverse species, conserved principles. *Neuron*. 2005;48(3):417–  
539 30. pmid: 16269360
- 540 2. Agbesi MP, Naylor S, Perkins E, Borsuk HS, Sykes D, Maclaine JS, et al. Complex flow in the  
541 nasal region of guitarfishes. *Comp Biochem Physiol A Mol Integr Physiol*, 2016;193:52–63.  
542 pmid: 26780177
- 543 3. Sepahi A, Salinas I. The evolution of nasal immune systems in vertebrates. *Mol Immunol*.  
544 2016;69:131–138. pmid:26391349
- 545 4. Kiyono H, Fukuyama S. NALT-versus Peyer's-patch-mediated mucosal immunity. *Nat Rev*

- 546 Immunol. 2004;4(9):699–710. pmid:15343369
- 547 5. Bailey M, Haverson K, Inman C, Harris C, Jones P, Corfield G, et al. The development of the  
548 mucosal immune system pre-and post-weaning: balancing regulatory and effector function. Proc  
549 Nutr Soc. 2005;64(4):451–457. pmid:16313686
- 550 6. Brandtzaeg P, Pabst R. Let's go mucosal: communication on slippery ground. Trends Immunol.  
551 2004;25(11):570–577. pmid:15489184
- 552 7. Zuercher AW, Coffin SE, Thurnheer MC, Fundova P, Cebra JJ, Nasal-associated lymphoid tissue  
553 is a mucosal inductive site for virus-specific humoral and cellular immune responses. J Immunol.  
554 2002;168(4):1796–1803. pmid:11823512
- 555 8. Rodríguez-Monroy MA, Rojas-Hernández S, Moreno-Fierros. Phenotypic and functional  
556 differences between lymphocytes from NALT and nasal passages of mice. Scand J Immunol.  
557 2007;65(3):276–288. pmid:17309783
- 558 9. Tacchi L, Musharrafieh R, Larragoite ET, et al. Nasal immunity is an ancient arm of the mucosal  
559 immune system of vertebrates. Nat Commun. 2014;5:5205. pmid:25335508
- 560 10. Salinas I. The Mucosal Immune System of Teleost Fish. Biology (Basel). 2015;4(3):525–539.  
561 pmid:26274978
- 562 11. Salinas I, Zhang YA Sunyer JO. Mucosal immunoglobulins and B cells of teleost fish. Dev  
563 Comp Immunol. 2011;35(12):1346–1365. pmid:22133710
- 564 12. Solem ST, Stenvik J. Antibody repertoire development in teleosts—a review with emphasis on  
565 salmonids and *Gadus morhua* L. Dev Comp Immunol. 2006;30(2):57–76. pmid:16084588
- 566 13. Bromage ES, Kaattari IM, Zwollo P, Kaattari SL. Plasmablast and plasma cell production and  
567 distribution in trout immune tissues. J Immunol. 2004;173(12):7317–7323. pmid:15585855

- 568 14. Zapata A, Diez B, Cejalvo T, Gutierrez-de Frias C, Cortes A. Ontogeny of the immune system of  
569 fish. *Fish Shellfish Immunol.* 2006;20:1267–136. pmid:15939627
- 570 15. Xu Z, Takizawa F, Parra D, Gómez D, von Gersdorff Jørgensen L, LaPatra SE, et al. Mucosal  
571 immunoglobulins at respiratory surfaces mark an ancient association that predates the emergence  
572 of tetrapods. *Nat Commun.* 2016;7:10728. pmid: 26869478
- 573 16. Zhang YA, Salinas I, Li J, Parra D, Bjork S, Xu Z, et al. IgT, a primitive immunoglobulin class  
574 specialized in mucosal immunity. *Nat Immunol.* 2010;11(9):827–835. pmid:20676094
- 575 17. Xu Z, Parra D, Gómez D, Salinas I, Zhang YA, von Gersdorff Jørgensen L, et al. Teleost skin, an  
576 ancient mucosal surface that elicits gut-like immune responses. *Proc Natl Acad Sci U S A,*  
577 2013;110(32):13097–13102. pmid:23884653
- 578 18. Tamura S, Iwasaki T, Thompson AH, Asanuma H, Chen Z, Suzuki Y, et al. Antibody-forming  
579 cells in the nasal-associated lymphoid tissue during primary influenza virus infection. *J Gen*  
580 *Virol.* 1998;79(Pt 2):291–299. pmid:9472613
- 581 19. Tanimoto T, Haredy AM, Takenaka N, Tamura S, Okuno Y, Mori Y, et al. Comparison of the  
582 cross-reactive anti-influenza neutralizing activity of polymeric and monomeric IgA monoclonal  
583 antibodies. *Viral Immunol* 2012;25(5):433–439. pmid:22985289
- 584 20. Wright AKA, Ferreira DM, Gritzfeld JF, Wright AD, Armitage K, Jambo KC, et al. Human nasal  
585 challenge with *Streptococcus pneumoniae* is immunising in the absence of carriage. *PLoS*  
586 *Pathog.* 2012;8(4):e1002622. pmid: 22496648
- 587 21. Sepahi A, Casadei E, Tacchi L, Muñoz P, Lapatra SE, Salinas I. Tissue microenvironments in the  
588 nasal epithelium of rainbow trout (*oncorhynchus mykiss*) define two distinct cd8 $\alpha$ <sup>+</sup> cell  
589 populations and establish regional immunity. *J Immunol.* 2016;197(11):4453–4463.

590 pmid:27798156

- 591 22. Sunyer, JO. Fishing for mammalian paradigms in the teleost immune system. *Nat Immunol.*  
592 2003;14(4):320–326 (2013). pmid:23507645
- 593 23. Berthelot C, Brunet F, Chalopin D, Juanchich A, Bernard M, Nođ B, et al. The rainbow trout  
594 genome provides novel insights into evolution after whole-genome duplication in vertebrates.  
595 *Nat Commun.* 2014;5:3657. pmid:24755649
- 596 24. Li J, Barreda DR, Zhang YA, Boshra H, Gelman AE, Lapatra S, et al. B lymphocytes from early  
597 vertebrates have potent phagocytic and microbicidal abilities. *Nat Immunol.* 2006;7(10):1116–  
598 1124. pmid:16980980
- 599 25. Pfaffl MW. A new mathematical model for relative quantification in real-time RT-PCR. *Nucleic*  
600 *Acids Res.* 2001;29(9):e45. pmid:11328886
- 601 26. Salic A, Mitchison TJ. A chemical method for fast and sensitive detection of DNA synthesis in  
602 vivo. *Proc Natl Acad Sci USA.* 2008;105(7):2415–2420. pmid:18272492
- 603 27. Sun K, Johansen FE, Eckmann L, Metzger DW. An important role for polymeric Ig  
604 receptor-mediated transport of IgA in protection against *Streptococcus pneumoniae*  
605 nasopharyngeal carriage. *J Immunol.* 2004;173(7):4576–4581. pmid:15383591
- 606 28. Johansen FE, Kaetzel C. Regulation of the polymeric immunoglobulin receptor and IgA  
607 transport: new advances in environmental factors that stimulate pIgR expression and its role in  
608 mucosal immunity. *Mucosal Immunol.* 2011;4(6):598–602. pmid:21956244
- 609 29. Lom J, Dyková I. Protozoan parasites of fishes: Developments in aquaculture and fisheries  
610 science. Elsevier, Amsterdam, 1992;26:1–315.
- 611 30. Ogawa K, Yokoyama H. Parasitic diseases of cultured marine fish in Japan. *Fish Pathology,*

- 612 1998;33(4):303–309. DOI:10.3147/jsfp.33.303
- 613 31. Ogawa K. Diseases of cultured marine fishes caused by platyhelminthes (monogenea, digenea,  
614 cestoda). *Parasitology*, 2015;142(1):178–195. pmid:24998438
- 615 32. Matthews RA. *Ichthyophthirius multifiliis* fouquet and ichthyophthiriosis in freshwater teleosts.  
616 *Adv Parasitol*, 2005;59:159–241. pmid:16182866
- 617 33. Buchmann K, Sigh J, Nielsen CV, Dalgaard M. Host responses against the fish parasitizing  
618 ciliate *Ichthyophthirius multifiliis*. *Vet Parasitol*, 2001;100(1):105–116. pmid:11522410
- 619 34. Woof JM, Russell MW. Structure and function relationships in IgA. *Mucosal Immunol*.  
620 2011;4(6):590–597. pmid:21937984
- 621 35. Suzuki T, Kawaguchi A, Aina A, Tamura S, Ito R, Multihartina P, et al. Relationship of the  
622 quaternary structure of human secretory IgA to neutralization of influenza virus. *Proc Natl Acad*  
623 *Sci U S A*. 2015;112(25):7809–7814. pmid:26056267
- 624 36. Ramirez-Gomez F, Greene W, Rego K, Hansen JD, Costa G, Kataria P. Discovery and  
625 characterization of secretory IgD in rainbow trout: secretory IgD is produced through a novel  
626 splicing mechanism. *J Immunol*. 2012;188(3):1341–1349. pmid:22205025
- 627 37. Powell KR, Shorr R, Cherry JD, Hendley JO. Improved method for collection of nasal mucus. *J*  
628 *Infect Dis*. 1977;136(1):109–111. pmid:886201
- 629 38. Okada T, Konishi H, Ito M, Nagura H, Asai J. Identification of secretory immunoglobulin A in  
630 human sweat and sweat glands. *J Invest Dermatol*. 1988;90(5):648–651. pmid:3283249
- 631 39. Aufrecht C, Tenner W, Salzer HR, Khoss AE, Wurst E, Herkner K. Salivary IgA concentration is  
632 influenced by the saliva collection method. *Eur J Clin Chem Clin Biochem*. 1992;30(2):81–83.  
633 pmid:1581413

- 634 40. Wu HY, Nikolova EB, Beagley KW, Russell MW. Induction of antibody-secreting cells and  
635 T-helper and memory cells in murine nasal lymphoid tissue. *Immunology*. 1996;88(4):493–500.  
636 pmid:8881748
- 637 41. Wu HY, Nguyen HH, Russell MW. Nasal lymphoid tissue (NALT) as a mucosal immune  
638 inductive site. *Scand J Immunol*. 1997;46(5), 506–513. pmid:9393634
- 639 42. Zuercher AW, Coffin SE, Thurnheer MC, Fundova P, Cebra JJ. Nasal-associated lymphoid tissue  
640 is a mucosal inductive site for virus-specific humoral and cellular immune responses. *J Immunol*.  
641 2002;168(4):1796–1803. pmid:11823512
- 642 43. Carrasco-Yepez M, Campos-Rodriguez R, Lopez-Reyes I, Bonilla-Lemus P, Rodriguez-Cortes  
643 AY, Contis-Montes de Oca A, et al. Intranasal coadministration of Cholera toxin with amoeba  
644 lysates modulates the secretion of IgA and IgG antibodies, production of cytokines and  
645 expression of pIgR in the nasal cavity of mice in the model of *Naegleria fowleri*  
646 meningoencephalitis. *Exp Parasitol*. 2014;145(1452):S84–92. pmid:24731967
- 647 44. Carrasco-Yepez MM, Campos-Rodríguez R, Reséndiz-Albor AA, Peñá-Juárez C, Contis-Montes  
648 de Oca A, Arciniega-Martínez IM, et al. *Naegleria fowleri* immunization modifies lymphocytes  
649 and APC of nasal mucosa. *Parasite Immunol*. 2018;40(3). pmid:29243267
- 650 45. Jarillo-Luna A, Moreno-Fierros L, Campos-Rodriguez R, Rodriguez-Monroy MA, Lara-Padilla  
651 E and Rojas-Hernandez S. Intranasal immunization with *Naegleria fowleri* lysates and Cry1Ac  
652 induces metaplasia in the olfactory epithelium and increases IgA secretion. *Parasite Immunol*.  
653 2008;30(1): 31–38. pmid:18086014
- 654 46. Clark TG, Dickerson HW. Antibody-mediated effects on parasite behavior: Evidence of a novel  
655 mechanism of immunity against a parasitic protist. *Parasitol Today*, 1997;13(12):477–480. pmid:

656 15275136

- 657 47. Clark TG, Lin TL, Dickerson HW. Surface Antigen Cross-Linking Triggers Forced Exit of a  
658 Protozoan Parasite from its Host. *Proc Natl Acad Sci U S A*. 1996;93(13):6825–6829.  
659 pmid:8692903
- 660 48. Eyles JE, Spiers ID, Williamson ED, Alpar HO. Analysis of local and systemic immunological  
661 responses after intra-tracheal, intra-nasal and intra-muscular administration of microsphere  
662 co-encapsulated *Yersinia pestis* sub-unit vaccines. *Vaccine*. 1998;16(20):20005–2009.  
663 pmid:9796057
- 664 49. Taylor HP, Dimmock NJ. Mechanism of neutralization of influenza virus by secretory IgA is  
665 different from that of monomeric IgA or IgG. *J Exp Med* 1985;161(1):198–209. pmid:2981953
- 666 50. Nakashima T, Hamashima Y. Local immune system of nasal mucosa in inflammation. IgA  
667 distribution and secretory activity. *Ann Otol Rhinol Laryngol*. 1980;89(2 Pt 1):140–146.  
668 pmid:6989305

669

670 **Figure Legends**

671 **Fig 1. Structural characterization of immunoglobulins in trout nasal mucus.**

672 (A) Fractionation of nasal mucus (~ 0.5 ml) by gel filtration (upper) followed by immunoblot  
673 analysis of the fractions with anti-trout IgM-, anti-trout IgD-specific mAbs, and anti-trout  
674 IgT-specific pAbs (lower).  $A_{280}$ , absorbance at 280 nm. (B) SDS-PAGE of gel-filtration fractions  
675 (4-15 %) corresponding to elution volumes of 8.5 ml and 11.5 ml under non-reducing conditions  
676 followed by immunoblot analysis with anti-trout IgM-, anti-trout IgD-specific mAbs or anti-trout  
677 IgT-specific pAbs. Immunoblot and densitometric analysis of the concentration of IgT, IgM and IgD  
678 in nasal mucus (C) and serum (D) ( $n = 12$  fish). Ratio of IgT to IgM concentration (E) and IgD to  
679 IgM concentration (F) in nasal mucus and serum, calculated from the values shown in C and D.  
680 Results in Fig C-F are expressed as mean and s.e.m. obtained from 12 individual fishes.

681 **Fig 2. Trout pIgR associates nasal sIgT.**

682 (A) SDS-PAGE under reducing conditions of trout serum and nasal mucus (~ 5  $\mu$ g each), followed  
683 by immunoblot analysis using anti-trout pIgR antibody. (B) Co-immunoprecipitation (CoIP) of nasal  
684 mucus with anti-trout IgT antibody, followed by immunoblot analysis under reducing conditions  
685 (pIgR detection, upper panels) or non-reducing conditions (IgT detection, lower panels). (C)  
686 Immunofluorescence staining for pIgR with IgT in olfactory organ paraffinic sections of rainbow  
687 trout. Differential interference contrast images of olfactory organ paraffin sections were stained with  
688 anti-trout pIgR (magenta), anti-trout IgT (green) and DAPI for nuclei (blue) ( $n = 9$ ) (isotype-matched  
689 control antibodies for anti-pIgR in S1A Fig). Enlarged sections of the areas outlined showing some



690 pIgR/IgT colocalization (white arrowhead). NC, nasal cavity; OE, olfactory epithelium; LP, lamina  
691 propria. Scale bar, 20  $\mu$ m. Data are representative of at least three different independent experiments.

692 **Fig 3. Kinetics of immune response and pathological changes in trout olfactory organ following**  
693 **Ich parasites infection.**

694 (A) Heat map illustrates results from quantitative real-time PCR of mRNAs for selected immune  
695 markers in parasite-challenged versus control fish measured at 1, 7, 14, 21, 28 and 75 days post  
696 infections with Ich parasite in the olfactory organ of rainbow trout ( $n = 6$  fish per group). Color value:  
697 log<sub>2</sub> (fold change). (B) Relative expression of IgM, IgD and IgT at 1, 7, 21, 28 and 75 days post  
698 infection with Ich parasite in olfactory organ of rainbow trout ( $n = 6$  fish per group). (C and D)  
699 Histological examination (haematoxylin & eosin stain; H & E) (C) of the olfactory organ and the  
700 width of the olfactory lamella (D) from ich-infected rainbow trout 7, 21, 28, 75 d.p.i and uninfected  
701 fish ( $n = 6$  fish per group). Black arrows indicate the width of LP at the tip (100  $\mu$ m from the  
702 lamellar tip) and medial (250  $\mu$ m from the lamellar tip) regions of the olfactory lammella and red  
703 arrows indicate goblet cells. \* $P < 0.05$ , \*\* $P < 0.01$  and \*\*\* $P < 0.001$  (one – way ANOVA with  
704 Bonferroni correction). Data are representative of at least three independent experiments (mean and  
705 s.e.m.). Anova, analysis of variance.

706 **Fig 4. IgT coats Ich parasite located in olfactory organ of infected trout.**

707 Four different microscope images (A-D) of slides immunofluorescence staining of Ich parasites in  
708 olfactory organ paraffinic sections from trout infected with Ich after 28 days ( $n = 6$ ). (A and B)  
709 Immunofluorescence stained with Ich (magenta), IgM (red) and IgT (green), nuclei stained with

710 DAPI (blue) (from left to right). (C and D) Immunofluorescence stained with Ich (magenta), IgD  
711 (red) and IgT (green) with nuclei stained with DAPI (blue) (from left to right); DIC images showing  
712 merged staining (isotype-matched control antibody staining, S3A-C Fig). Scale bars, 20  $\mu$ m. Data are  
713 representative of at least three different independent experiments.

714 **Fig 5. Accumulation of IgT<sup>+</sup> B cells in the olfactory organ of trout infected with Ich.**

715 DIC images of immunofluorescence staining on trout nasal paraffinic sections from uninfected fish  
716 (A), 28 days infected fish (B) and survivor fish (C), stained for IgT (green) and IgM (red); nuclei are  
717 stained with DAPI (blue). (D) Enlarged images of the areas outlined in c are showing some IgT<sup>+</sup> B  
718 cells possibly secreting IgT (white arrowhead) (isotype-matched control antibody staining, S1B Fig).  
719 NC, nasal cavity; OE, olfactory epithelium; LP, lamina propria. Scale bar, 20  $\mu$ m. Data are  
720 representative of at least three different independent experiments ( $n = 8$  per group).

721 **Fig 6. Increases of IgT<sup>+</sup> B cells and IgT concentration in the olfactory organ of trout infected**  
722 **with Ich.**

723 Percentage of IgT<sup>+</sup> and IgM<sup>+</sup> B cells in NALT (A) and head kidney (B) leukocytes of uninfected  
724 control fish, infected fish and survivor fish measured by flow cytometric analysis ( $n = 12$  per group).  
725 Concentration of IgT, IgM and IgD in nasal mucus (C) and serum (D) of control, infected and  
726 survivor fish ( $n = 12$  per group). \* $P < 0.05$ , \*\* $P < 0.01$  and \*\*\* $P < 0.001$  (one – way ANOVA with  
727 Bonferroni correction). Data are representative of at least three independent experiments (mean and  
728 s.e.m.). Anova, analysis of variance.

729 **Fig 7. Immunoglobulin responses in the nasal mucus and serum from infected and survived**

730 **trout.**

731 (A) Western blot analysis of IgT-, IgM- and IgD- specific binding to Ich in nasal mucus (dilution 1:2)  
732 from infected and survivor fish. (B and C) IgT-, IgM- and IgD- specific binding to Ich in dilutions of  
733 nasal mucus from infected (B) and survivor (C) fish, evaluated by densitometric analysis of  
734 immunoblots and presented as relative values to those of control fish ( $n = 8$  per group). (D) Western  
735 blot analysis of IgT-, IgM- and IgD- specific binding to Ich in serum (dilution 1:10) from infected  
736 and survivor fish. (E and F) IgT-, IgM- and IgD- specific binding to Ich in dilutions of serum from  
737 infected (E) and survivor (F) fish, evaluated by densitometric analysis of immunoblots and presented  
738 as relative values to those of control fish ( $n = 8$  per group).  $*P < 0.05$ ,  $**P < 0.01$  and  $***P < 0.001$   
739 (unpaired Student's *t*-test). Data are representative of at least three independent experiments (mean  
740 and s.e.m.).

741 **Fig 8. Proliferative responses of IgT<sup>+</sup> and IgM<sup>+</sup> B cells in the olfactory organ of survived trout.**

742 Immunofluorescence analysis of EdU incorporation by IgT<sup>+</sup> or IgM<sup>+</sup> B cells in olfactory organ of  
743 control (A) and survivor fish (B). Nasal paraffin sections were stained for EdU (magenta), trout IgT  
744 (green), trout IgM (red) and nuclei (blue) detection ( $n = 8$  fish per group). NC, nasal cavity; OE,  
745 olfactory epithelium; LP, lamina propria. Scale bars, 20  $\mu$ m. (C) Percentage of EdU<sup>+</sup> cells from total  
746 nasal cell in control or survivor fish counted from Fig 7A and B ( $n = 8$ ). (D) Percentage of EdU<sup>+</sup> cells  
747 from the total IgT<sup>+</sup> or IgM<sup>+</sup> B cells populations in olfactory organ of control and survivor fish  
748 counted from A and B. Data in A and B are representative of at least three independent experiments  
749 (mean and s.e.m.). Statistical analysis was performed by unpaired Student's *t*-test.  $*P < 0.05$ ,  $**P <$   
750  $0.01$  and  $***P < 0.001$ .

751 **Fig 9. Local IgT-, IgM- and IgD-specific responses in olfactory organ explants of survivor fish.**

752 The olfactory organ, head kidney and spleen explants (~ 20 mg each) from control and survivor fish  
753 were cultured for 7 days. Immunoblot analysis of IgT-, IgM- and IgD-specific binding to Ich in the  
754 culture medium of olfactory organ (A), head kidney (B) and spleen (C) (dilution 1:2) from control  
755 and survivor fish. (D-F) IgT-, IgM- and IgD-specific binding to Ich in dilutions of culture medium  
756 from olfactory organ (D), head kidney (E) and spleen (F) from control and survivor fish, measured  
757 by densitometric analysis of immunoblots and presented as relative values to those of control fish ( $n$   
758 = 6-8 per group). \* $P < 0.05$ , \*\* $P < 0.01$  and \*\*\* $P < 0.001$  (unpaired Student's  $t$ -test). Data are  
759 representative of at least three independent experiments (mean and s.e.m.).

760 **Fig 10. Proposed model of local IgT and IgT<sup>+</sup> B cell induction in the olfactory organ.**

761 Model images represent a fish (A) and enlarged sections of the areas outlined in a showing the  
762 olfactory organ (B). (C) Induction of local IgT responses in the trout olfactory organ based on our  
763 findings. When Ich parasite invaded the nasal mucosa, Ich antigen (Ag) are taken up by  
764 antigen-presenting cells (APC) and presented to naïve CD4-T cells. Ag-specific CD4-T cells then  
765 produced cytokines to activate B cells. Activated B cells start proliferating in olfactory organ and  
766 may differentiate to plasma cells to locally produce Ich-specific IgT, which will be transported by  
767 pIgR into nasal mucus where can specific binding to the Ich parasite. Alternatively, some IgT<sup>+</sup>  
768 plasma cells may differentiate into memory IgT<sup>+</sup> B cells. When Ich parasite infection happened again  
769 in olfactory organ, memory IgT<sup>+</sup> B cells directly proliferate and differentiate into plasma cells and  
770 produce larger amounts of specific-IgT to binding Ich. The trout olfactory organ showing the  
771 mucosal tip area with goblet cells and the lateral neuroepithelium. NC, nasal cavity; OM, olfactory

772 mucus; OE, olfactory epithelium; LP, lamina propria.

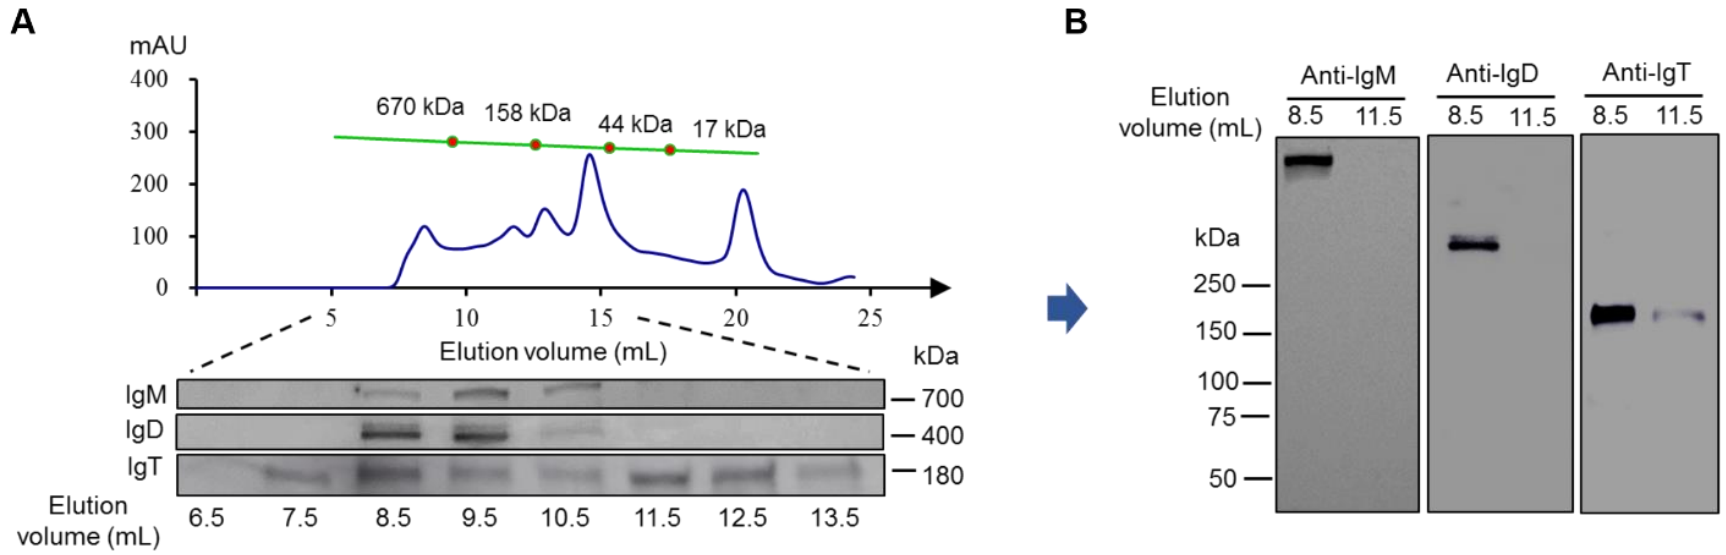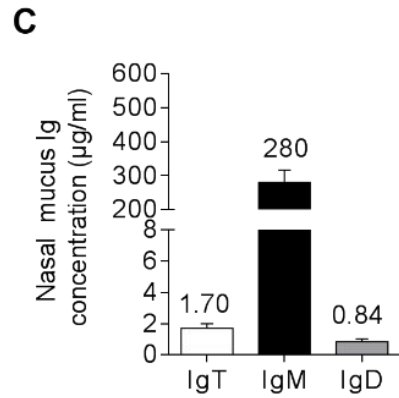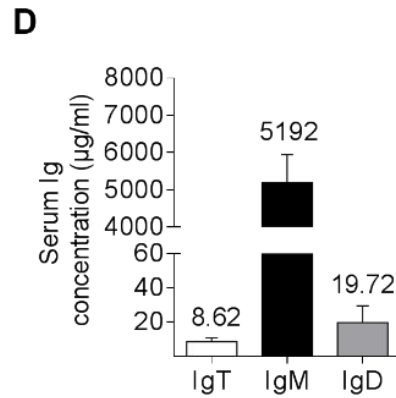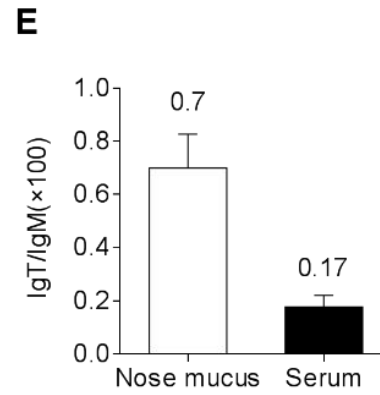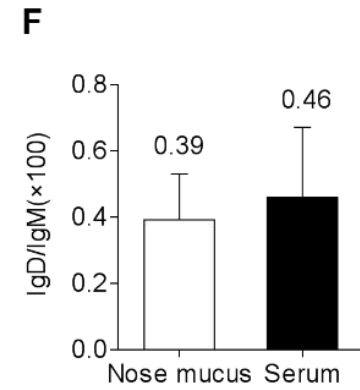

776 Fig 2

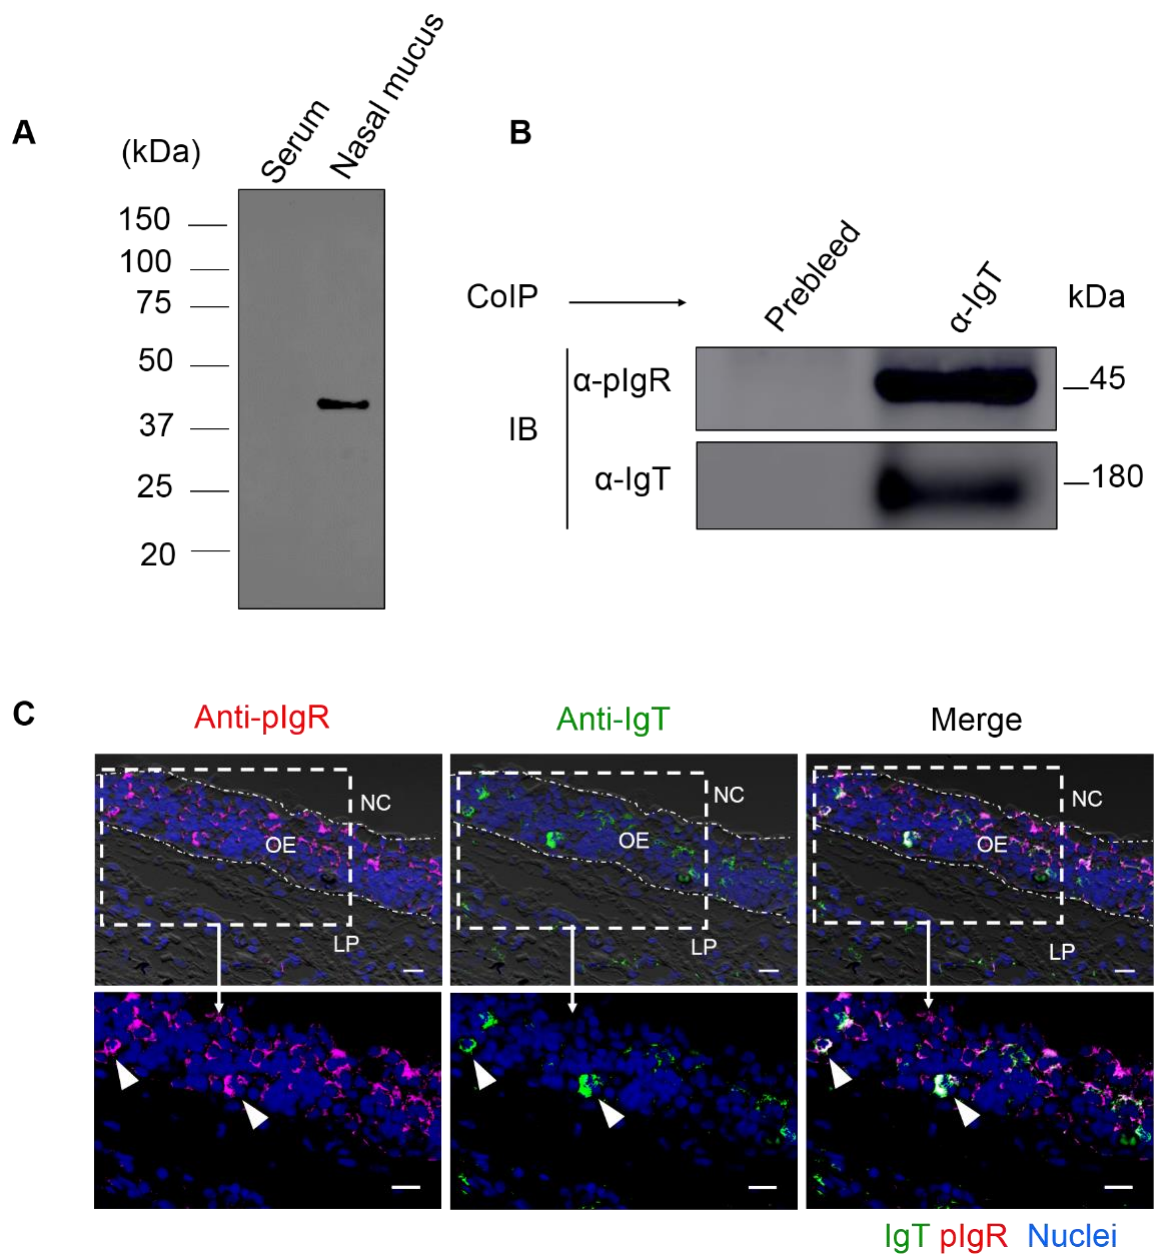

777

778

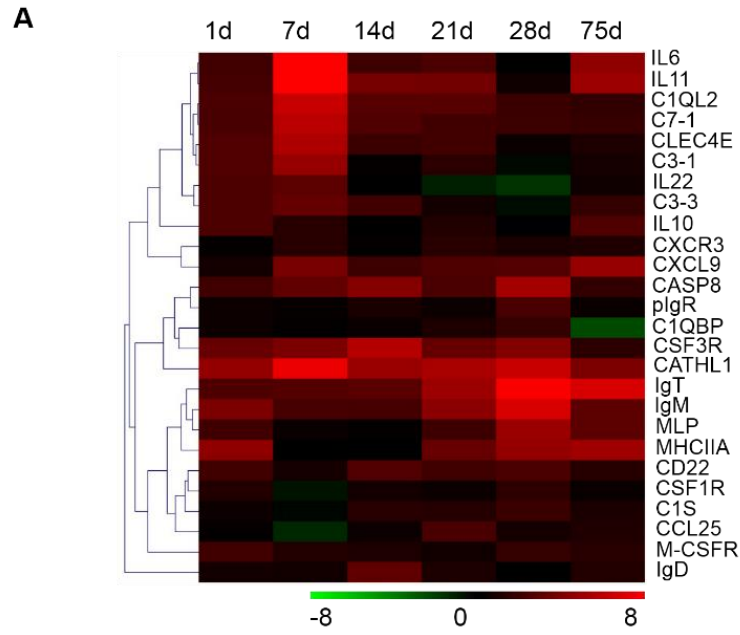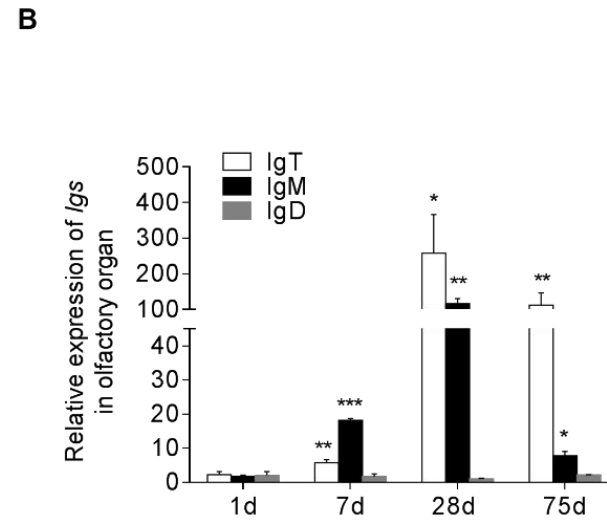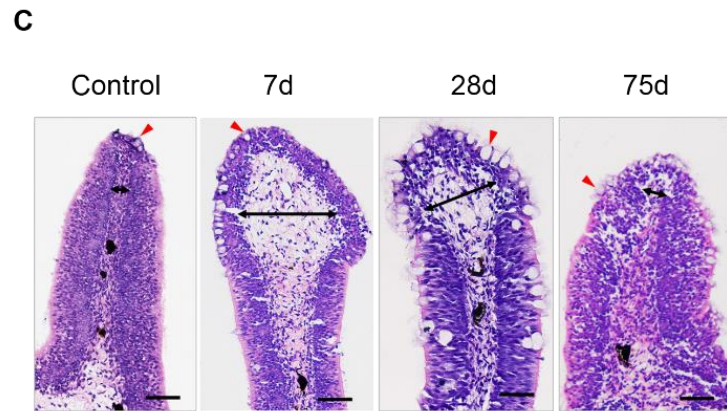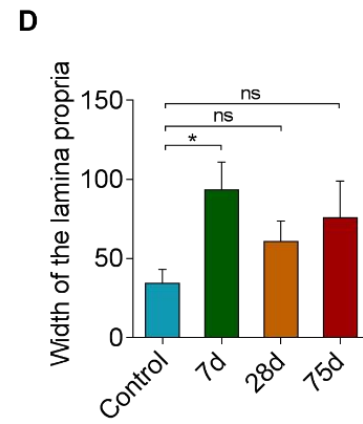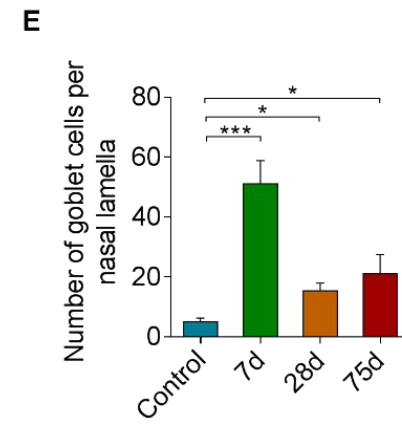

780

781



782 Fig 4

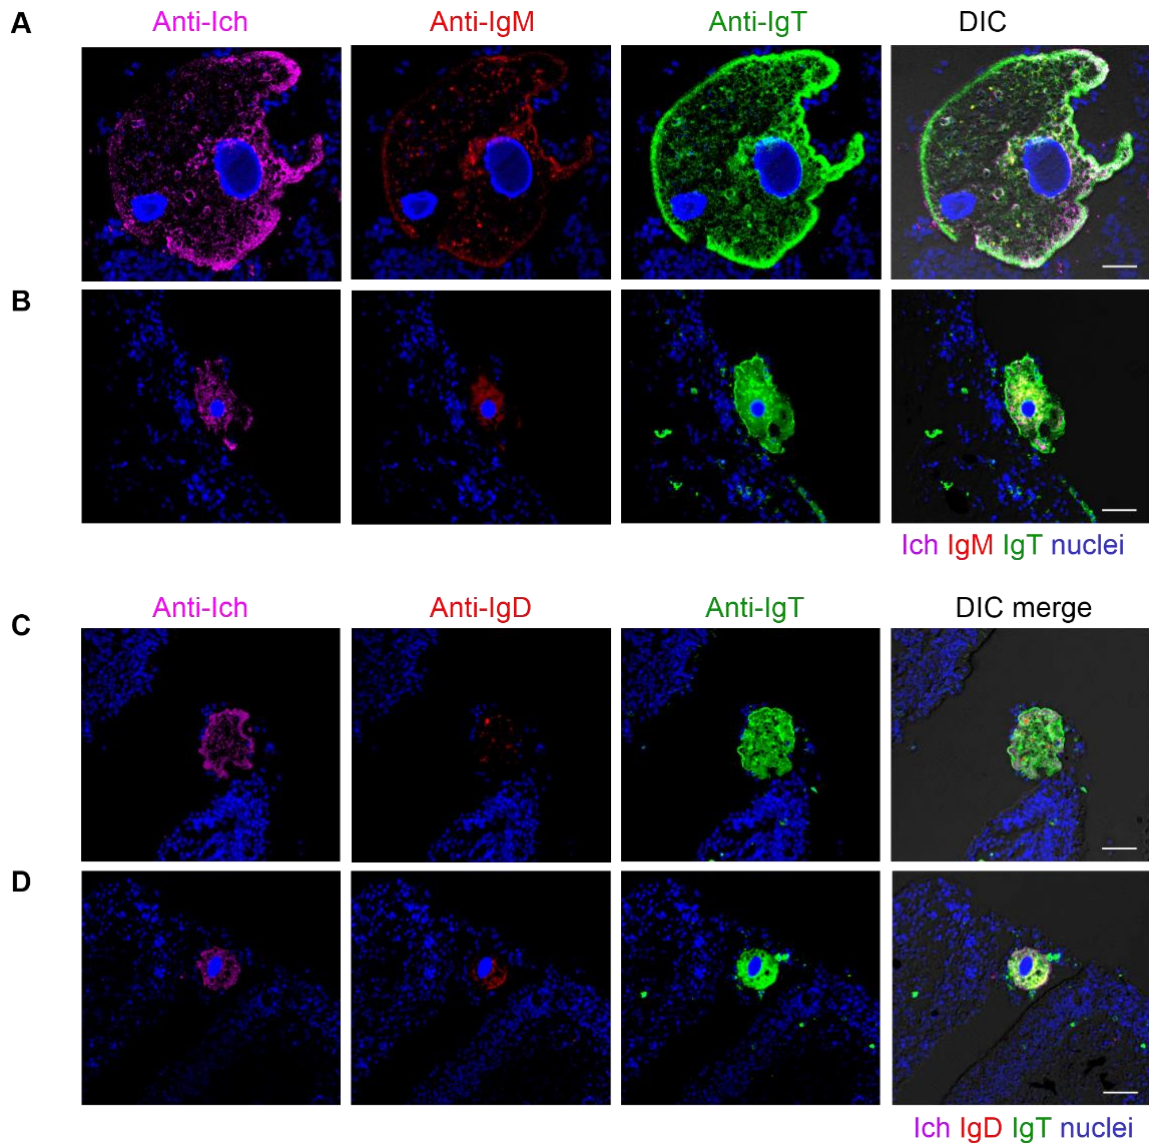

783  
784

785 Fig 5

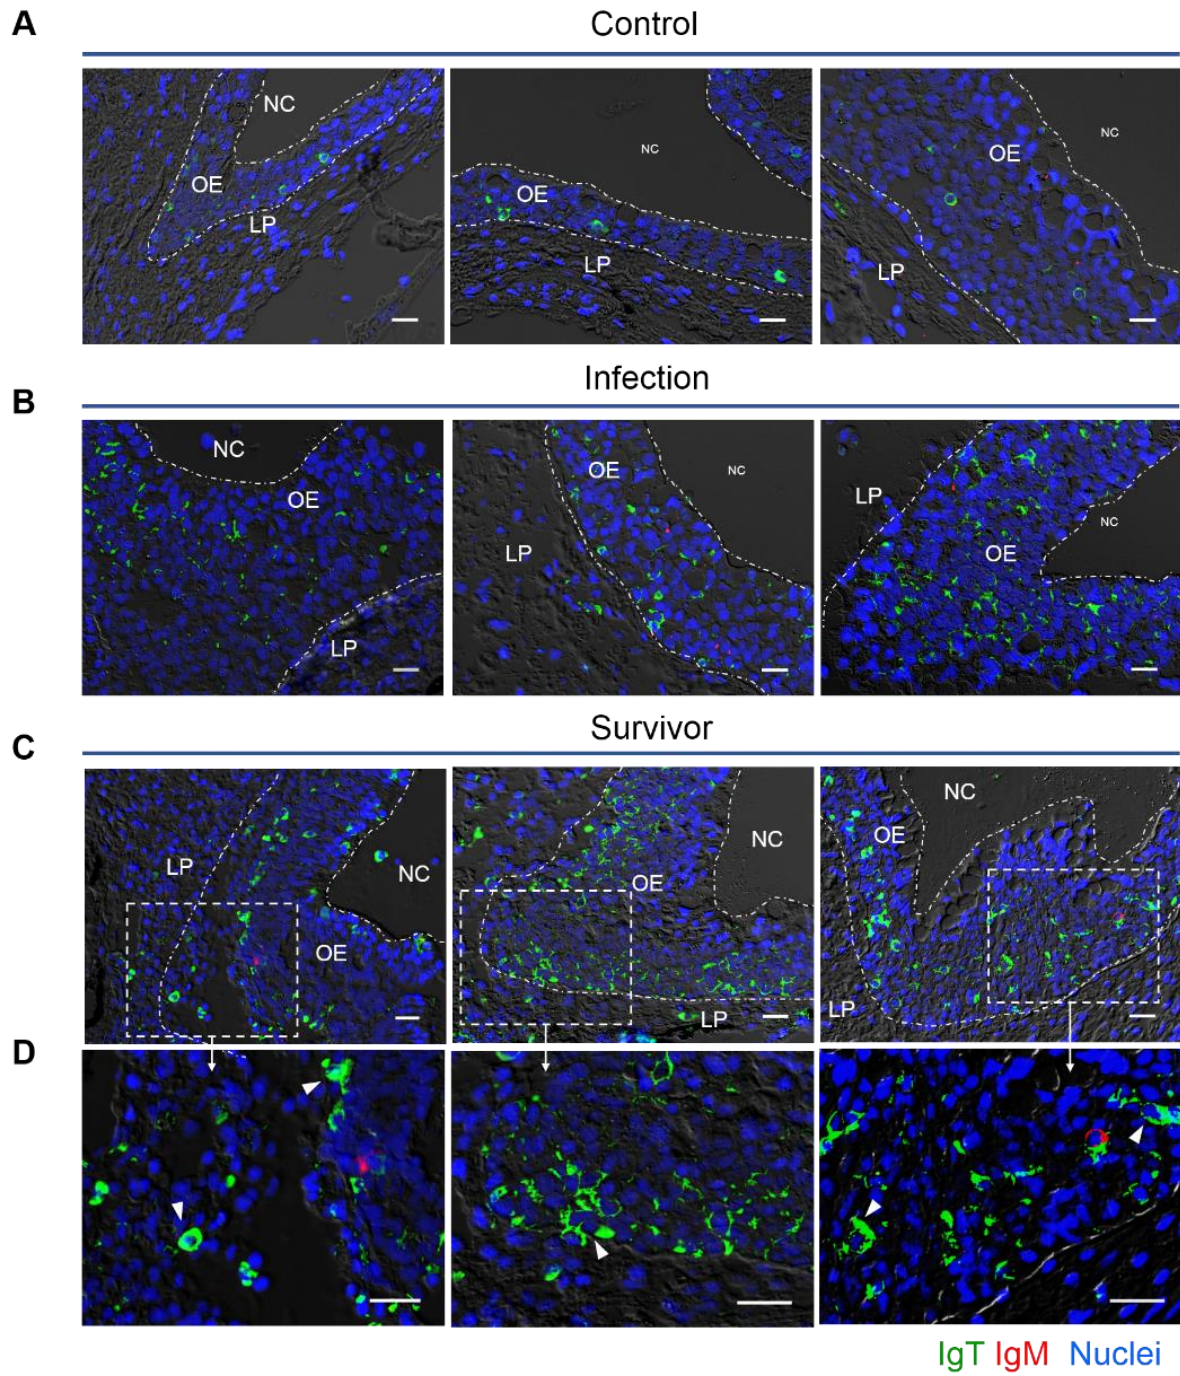

786

787

788 Fig 6

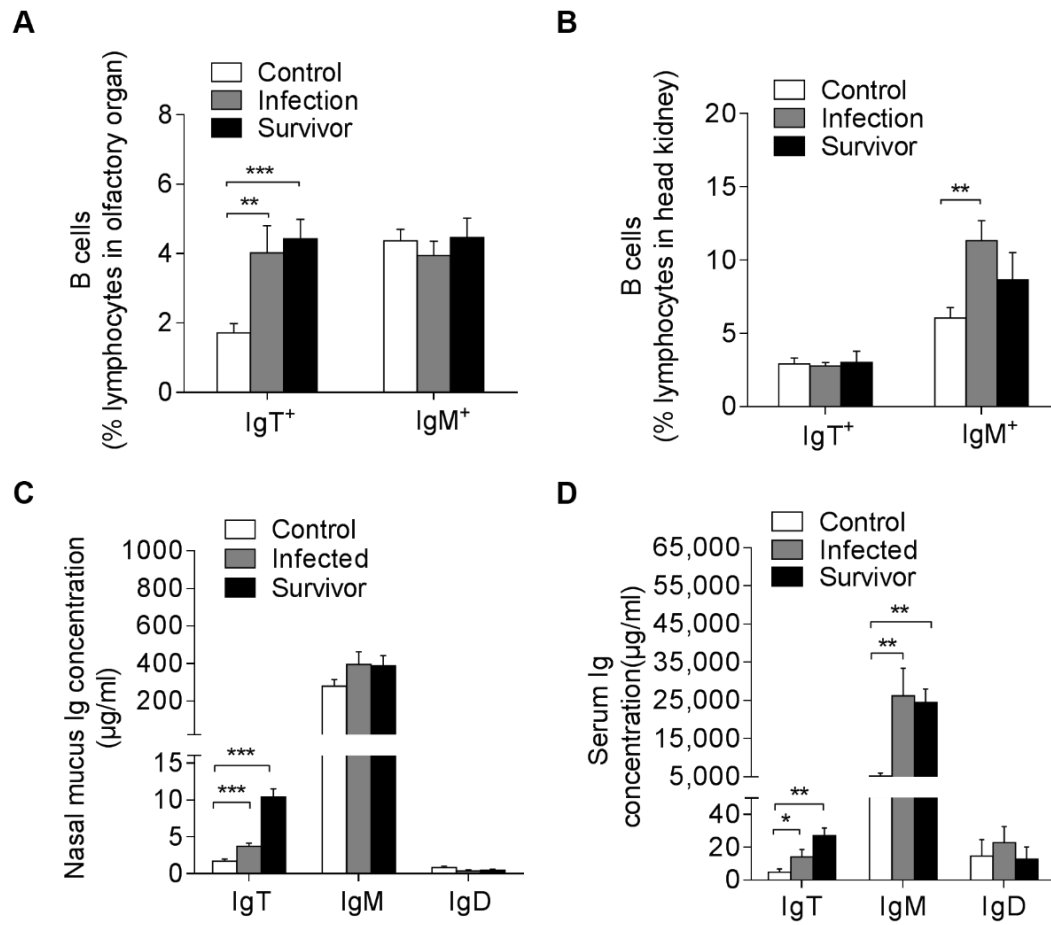

789  
790

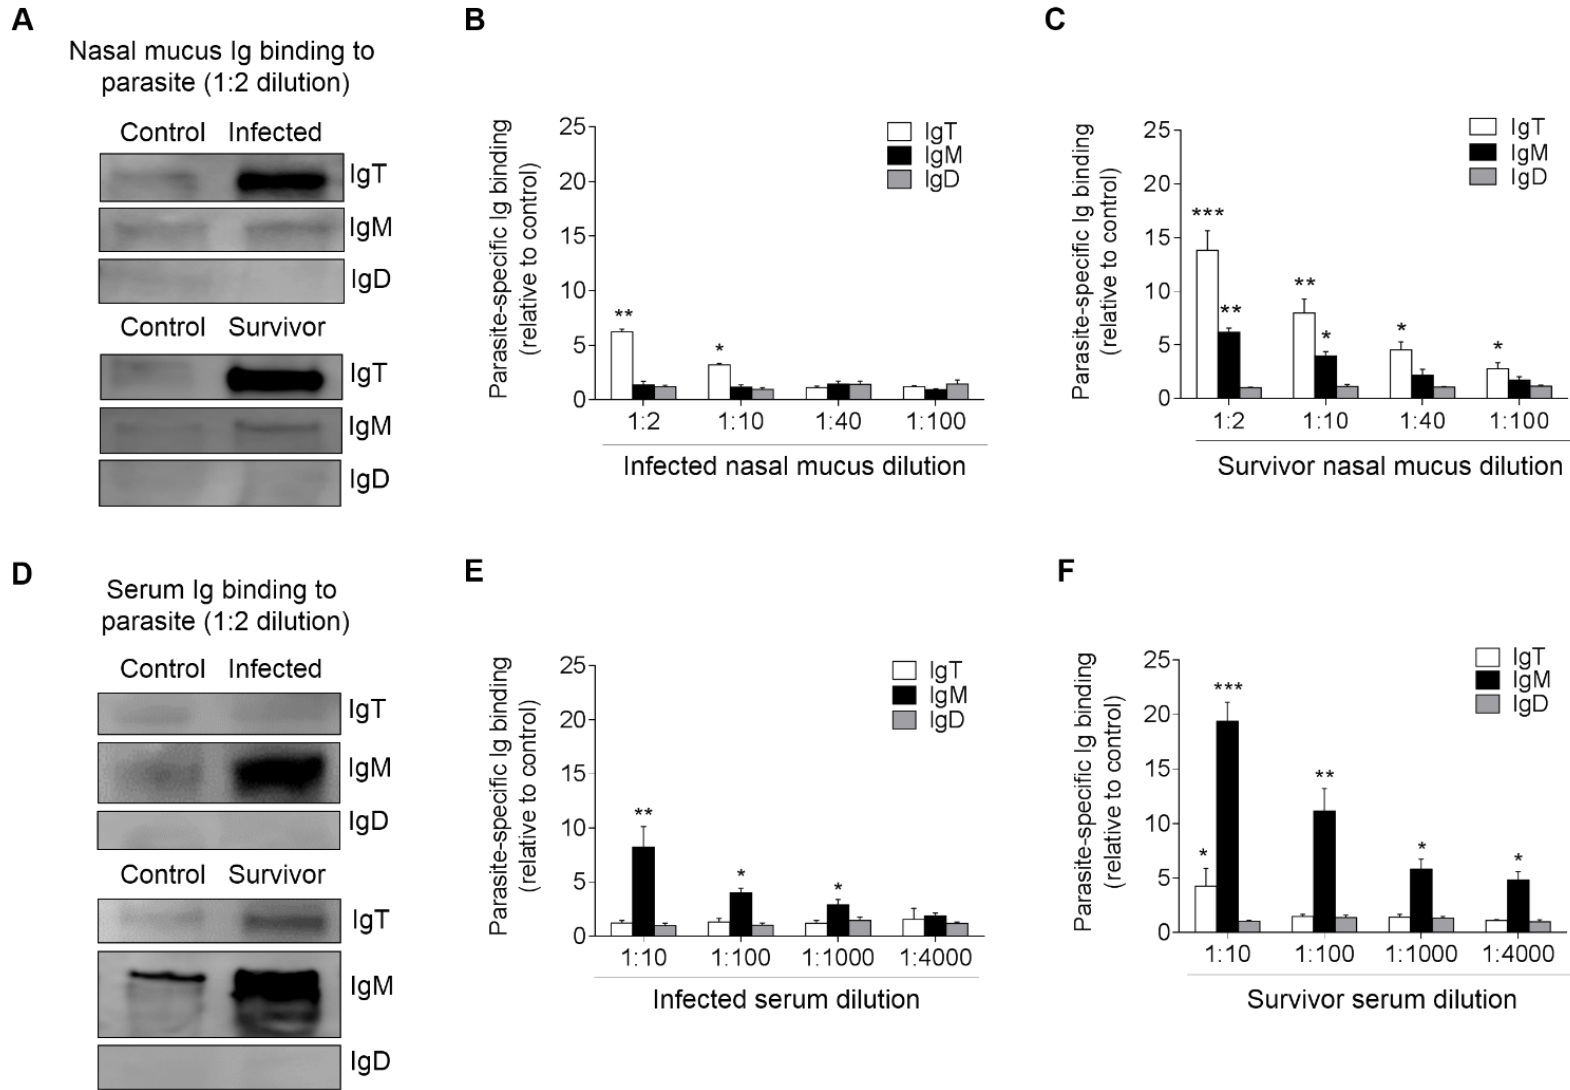



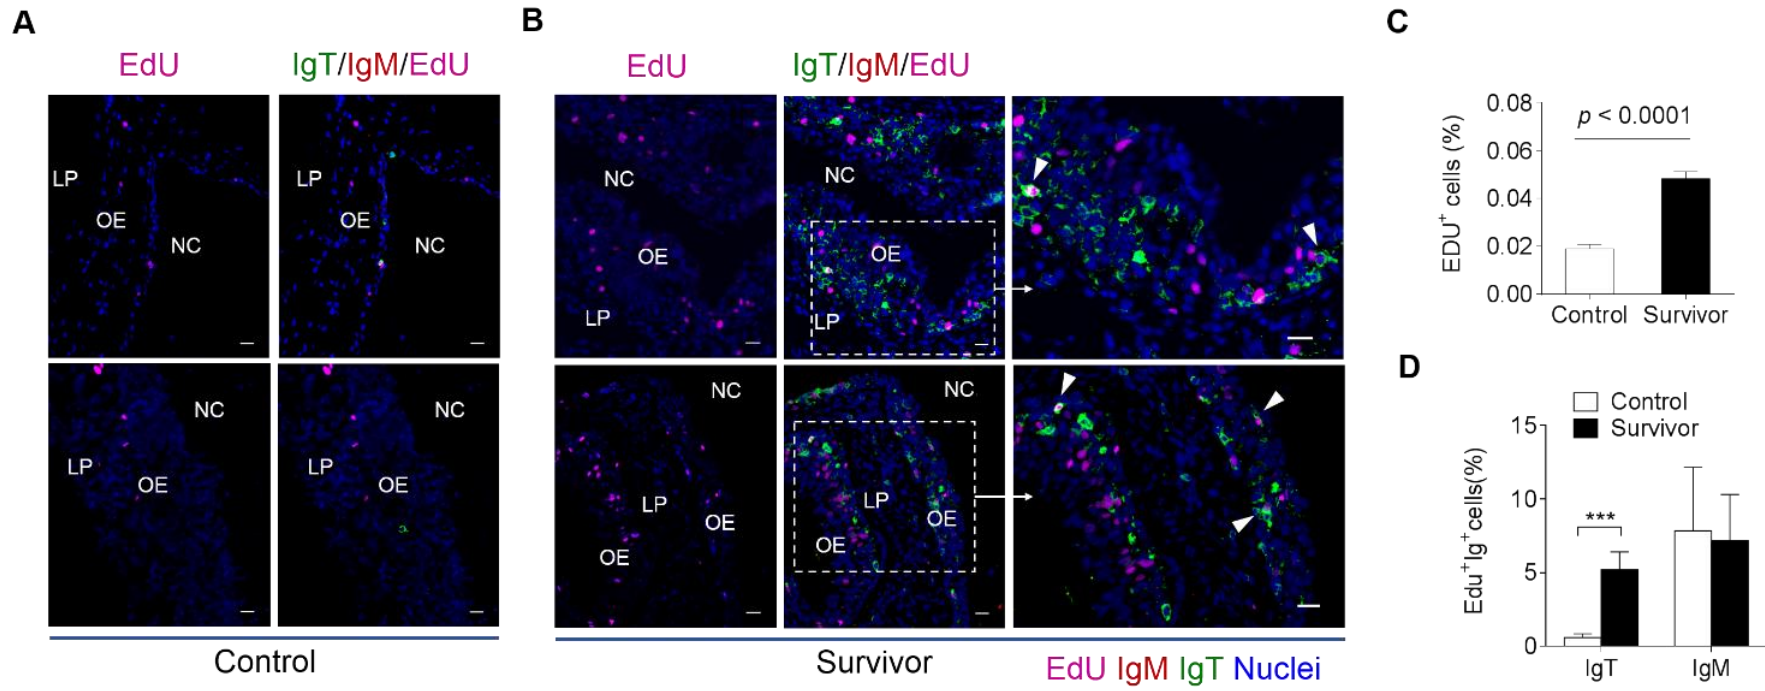

795

796

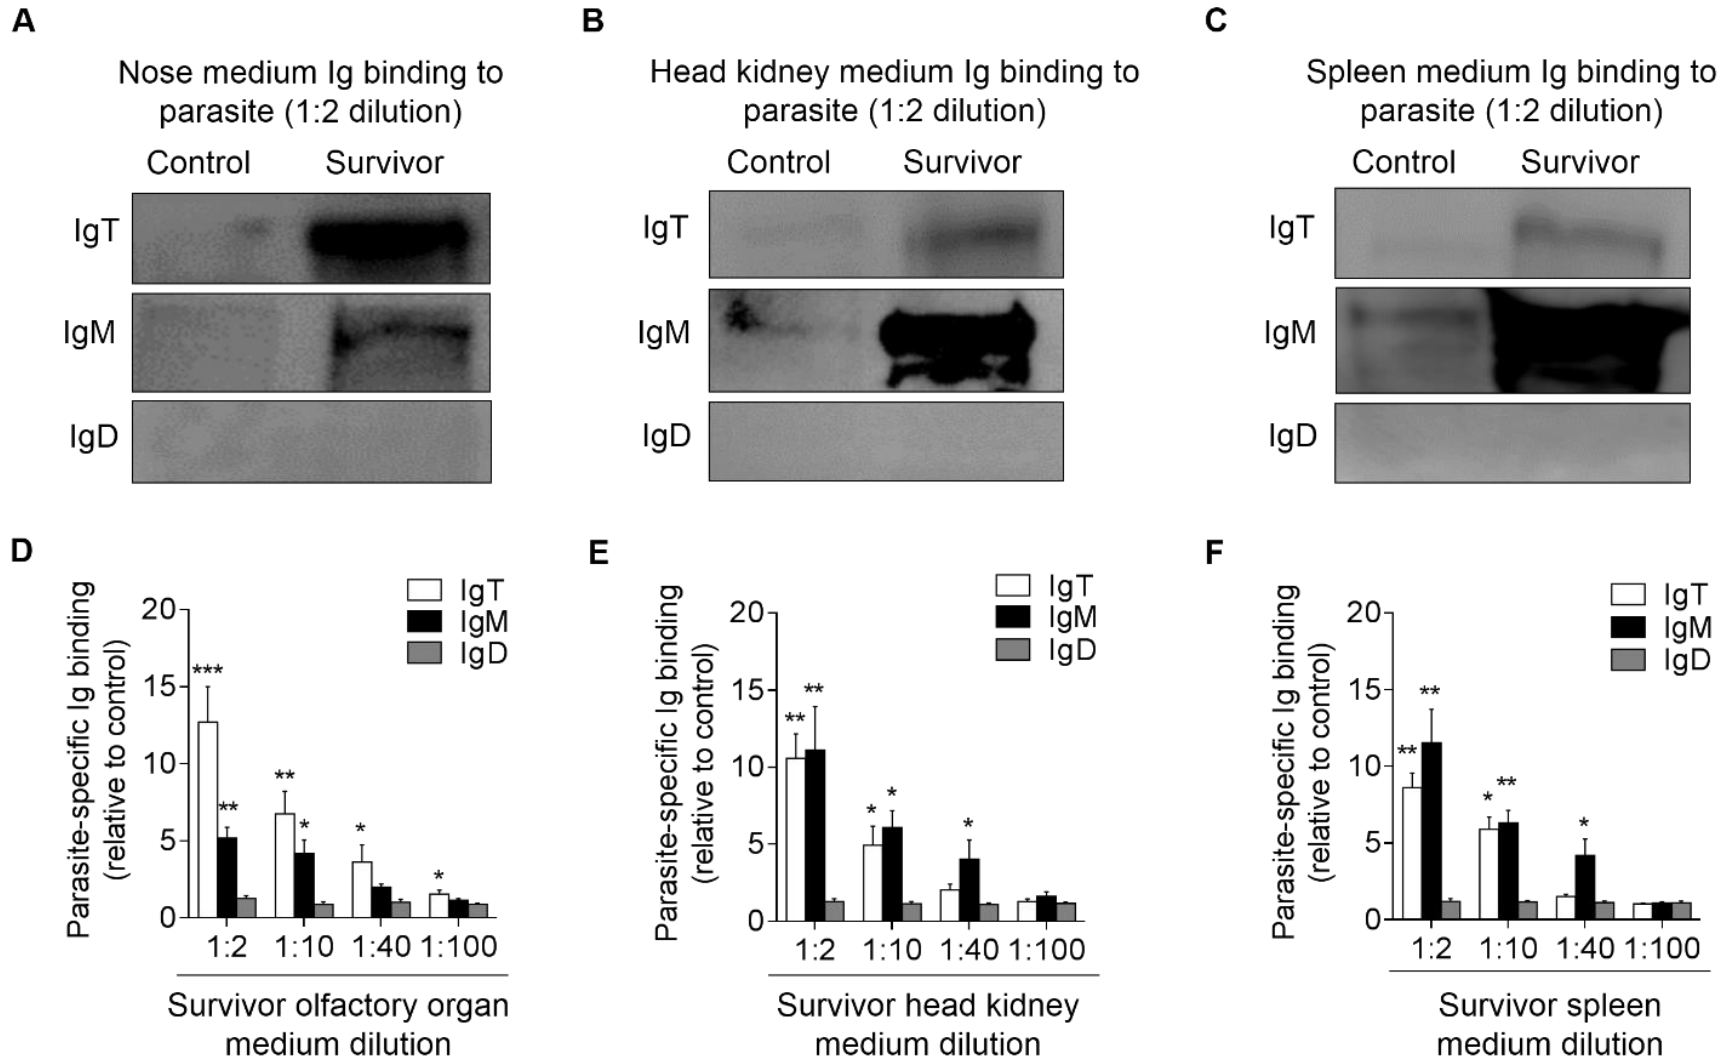

798

799

800 Fig 10

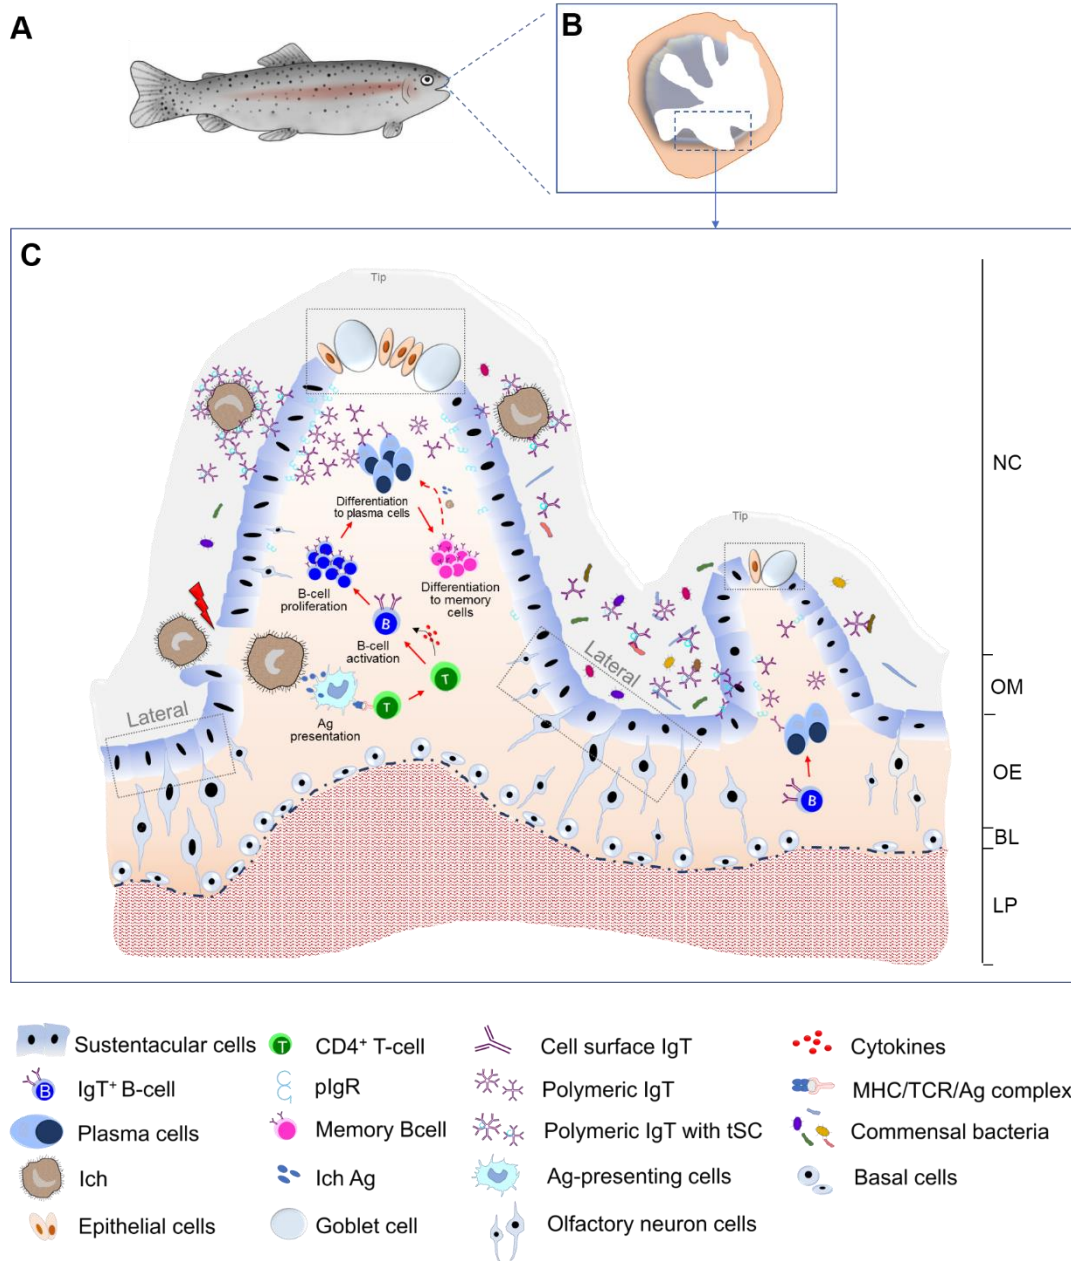

801  
802

803 **Supporting information**

804 **S1 Fig. Isotype control staining for anti-IgT, anti-IgM and anti-pIgR antibodies in trout**  
805 **olfactory organ paraffin sections.**

806 Differential interference contrast images of olfactory organ paraffin sections from 28 days  
807 Ich-infected fish (A middle and B), survivor fish (A right), and control fish (A left), with merged  
808 staining of isotype control antibodies for anti-trout IgT (green) or anti-trout IgM mAbs (red) (A); or  
809 for anti-trout pIgR pAb (green, B). Nuclei were stained with DAPI (blue, A and B). NC, nasal cavity;  
810 OE, olfactory epithelium; LP, lamina propria. Scale bar, 20  $\mu\text{m}$ . Data are representative of at least  
811 three different independent experiments.

812 **S2 Fig. The detection of Ich parasite in olfactory organ of trout infected with Ich.**

813 (A) Infection method with Ich parasite by bath has been used in this study. (B) The phenotype of  
814 rainbow trout was observed at 7 days post infection with Ich ( $n = 12$ ). The red arrows represent the  
815 obvious white dot in skin (lower, left) and fin (lower, right). (C) Histological studies of olfactory  
816 organ from 7 days Ich-infected trout by staining with haematoxylin / eosin (H & E). Results are  
817 representative of one experiment  $n = 6$ . Scale bar: 50  $\mu\text{m}$ . (D) The relative expression of  
818 Ich-18SrRNA gene in olfactory organ, gills, skin, spleen and head kidney from 7 days Ich-infected  
819 trout. (E) The relative expression of Ich-18SrRNA gene in olfactory organ at 1, 7, 14, 21, 28 and 75  
820 days post infection. Data in d and e are representative of at least three independent experiments  
821 (mean and s.e.m.). Statistical analysis was performed by unpaired Student's *t*-test. \* $P < 0.05$ , \*\* $P <$   
822  $0.01$  and \*\*\* $P < 0.001$ .



823 **S3 Fig. Isotype control staining for anti-Ich antibodies in trout olfactory torgan paraffin**  
824 **sections.**

825 Three different microscope images of consecutive slides of prebleed (A-C left) and anti-Ich (A-C  
826 right) antibodies staining of Ich parasite in olfactory organ paraffin sections from 28 days  
827 Ich-infected fish ( $n = 4$ ). Nuclei were stained with DAPI (blue) and Ich with anti-Ich pAb (magenta).  
828 Scale bars, 20  $\mu\text{m}$ . Data are representative of three independent experiments.

829 **S4 Fig. Proliferative responses of IgT<sup>+</sup> and IgM<sup>+</sup> B cells in the olfactory organ and head kidney**  
830 **of survivor trout.**

831 (A and B) Percentage of EdU<sup>+</sup> cells from total olfactory organ and head kidney IgT<sup>+</sup> and IgM<sup>+</sup> B cell  
832 populations in control and survivor fish by flow cytometry analysis ( $n = 9$ ). Data are representative  
833 of at least three different independent experiments (mean and s.e.m). Statistical analysis was  
834 performed by unpaired Student's *t*-test. \* $P < 0.05$ , \*\* $P < 0.01$  and \*\*\* $P < 0.001$ .

835 **S1 Table. List of primers for real-time quantitative PCR amplifications.**

836

837 S1 Fig

**A**

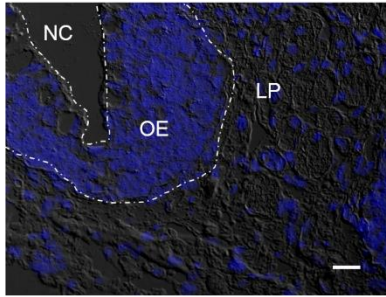

pIgR (Isotype control) Nuclei

**B**

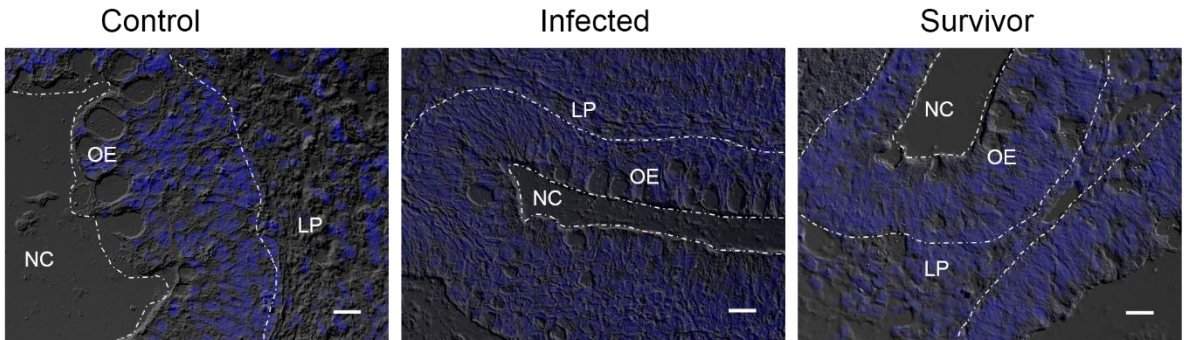

IgT IgM (Isotype control) Nuclei

838

839

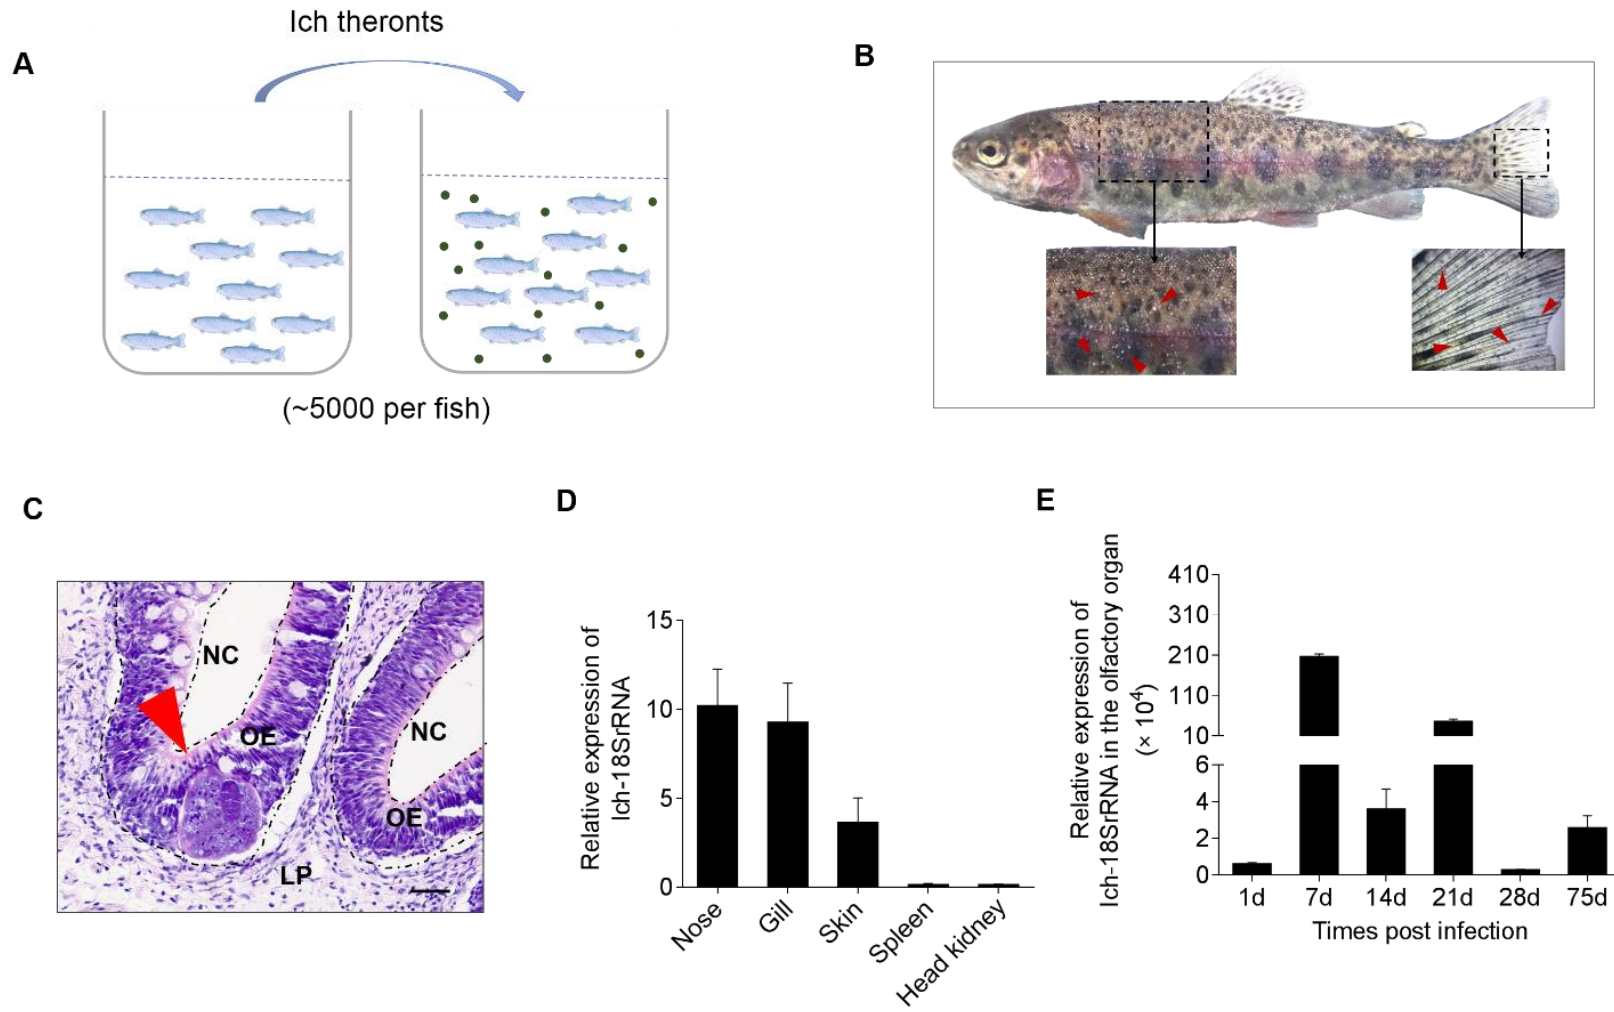

841

842

843 S3 Fig

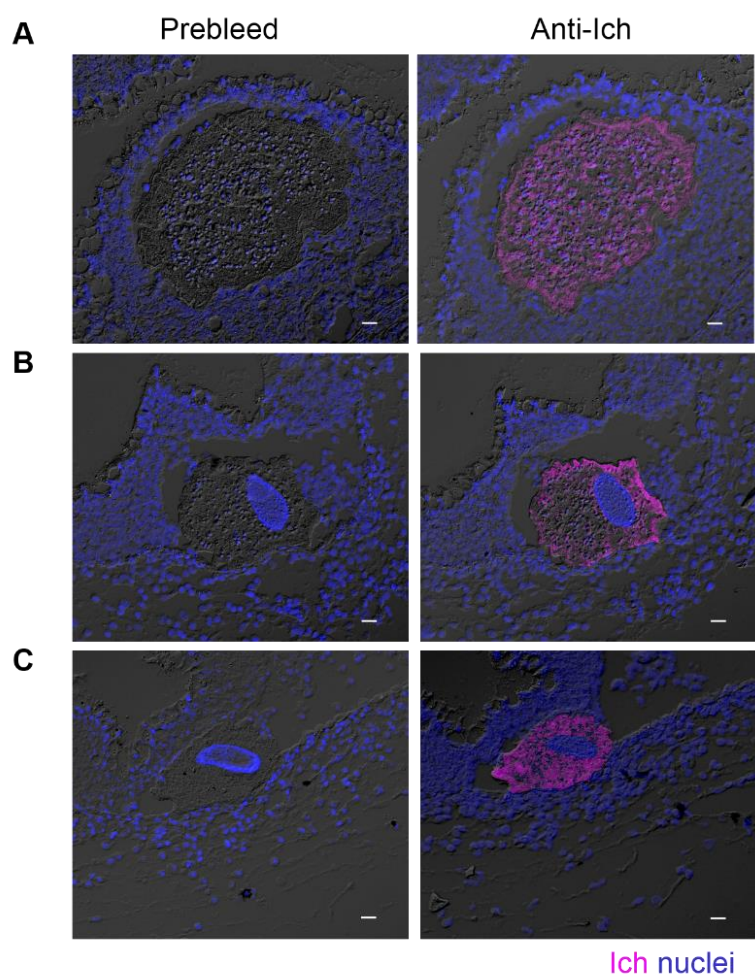

844  
845

846 S4 Fig

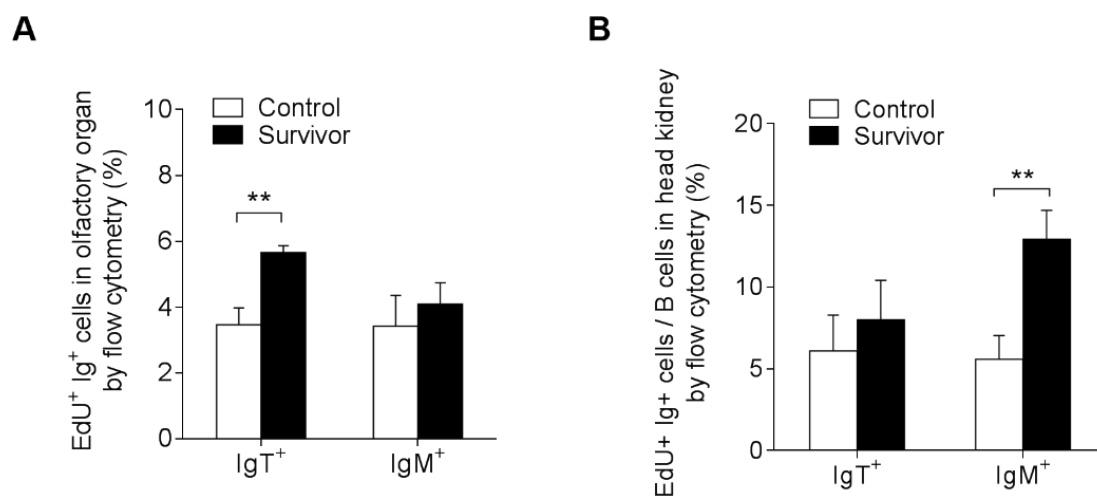

847

848

849 S1 Table

| Primer name | Primer sequence (5'- 3')                               | Accession number |
|-------------|--------------------------------------------------------|------------------|
| IL6         | F: ATTCATCGTTCTCACAGC<br>R: ACTACCTCAGCAACCTTCA        | CCV01624.1       |
| C3-3        | F: TGCATGGGATCGCTAAAAGTG<br>R: CCAATGACAGACAGGGTGACTTC | U61753           |
| C3-1        | F: GAGATGGCCTCCAAGAAGATAGAA<br>R: ACCGCATGTACGCATCATCA | L24433           |
| IL11        | F: CAGAGCGTCAAGGAAACAC<br>R: GCTCCTGGGAAGACTGTAA       | NM_001124382.1   |
| IL22        | F: CATCCTGGACTTCTACCTG<br>R: CCATCTCGGACAACCTTCTT      | NM_001164064.1   |
| C7-1        | F: GTCTATGTGGAGTTACAGGCTA<br>R: ACTTCTGCGATACGGATT     | NM_001124618.1   |
| C1QL2       | F: GTCTACTCAAACATCGGC<br>R: CATTCTTGGTCAAACACAC        | XM_021624859.1   |
| CLEC4E      | F: GCAGCCACCTTACCATC<br>R: CACCCATCTCCAATCCC           | XM_021562202.1   |
| IL10        | F: CACCGCCTTCTCCACCATC<br>R: CCATAGCGTGACACCCCAC       | NM_001245099.1   |
| CXCL9       | F: GTTCCCTCGCCACTTCAA<br>R: GCCACCCACTTGCTCTTTG        | NP_001268281.1   |
| CASP8       | F: TGGTGGCAAAGGAGTTAT<br>R: CAGGAAATCGGCATCAGC         | XM_021588999.1   |
| pIgR        | F: AGAAGCGTTGGTGTGCGTA<br>R: AAGCCTTGGTCAGGTCAT        | FJ940682.1       |
| C1QBP       | F: CCGCAGTCCGAATTTCTA<br>R: GCTTTGTCTCCTTCCGTAT        | XM_021617398.1   |
| CSF3R       | F: GGGAGGAGATTCCACTATGC<br>R: TGACAGCCCAACACCAGA       | NM_001124402.1   |
| CATHL1      | F: CTGGAGGCAAGCAACAAC<br>R: CCCCCAAGACGAGAGACA         | AY382478.1       |
| IgT         | F: CAGACAACAGCACCTCACCTA<br>R: GAGTCAATAAGAAGACACAACGA | AY870264         |
| IgM         | F: AAGAAAGCCTACAAGAGGGAGA<br>R: CGTCAACAAGCCAAGCCACTA  | OMU04616         |
| MLP         | F: GCTCTACTATCCAGCCAAC<br>R: GCATCCACAGTCACGAAC        | XM_021578564.1   |
| MHCIIA      | F: GGGTGAGTTTGTGGATAC<br>R: AGCGTTAGGCTTACATAGA        | DQ246664.1       |
| CD22        | F: TGAAGATGACAGTGGCAGAT                                | XP_014056970.1   |

|              |                                                                          |                |
|--------------|--------------------------------------------------------------------------|----------------|
| M-CSFR       | R: GGAGGGTTACAGGTGGAG<br>F: CCCGCCTGTCACCCAATCT<br>R: CGTCCCACCAATGCTTCT | AB091826       |
| CCL25        | F: CGTGCCTGCTTGTAATG<br>R: GGGATGTGGGAAATGTC                             | XM_021603672.1 |
| C1S          | F: AACAGCCAATGGTTTTTTCAC<br>R: GATTCCTTTCCCAGTTCACA                      | KKF27649.1     |
| CSF1R        | F: GTGAAGGAGGGCAGTGAT<br>R: GATGGTGGCAAACGCAAG                           | NM_001124738.1 |
| IgD          | F: CAGGAGGAAAGTTCGGCATCA<br>R: CCTCAAGGAGCTCTGGTTTGGA                    | JN173049.1     |
| EF1 $\alpha$ | F: CAACGATATCCGTCGTGGCA                                                  | NM_001124339.1 |

---

850
